# Supplementary material for: Synthesis of pyrazolo[5,1-a]isoquinolines through copper-catalyzed regioselective bicyclization of N-propargylic sulfonylhydrazones
Source: Royal Society of Chemistry journal article supplement (doi:10.1039/c7qo00249a), 2017-01-01

# Synthesis of Pyrazolo[5,1-*a*]isoquinolines through Copper- Catalyzed Regioselective Bicyclization of *N*-Propargylic Sulfonylhydrazones

Hai-Tao Tang, Jia-Hao Zeng, Jun-Jia Chen, Yun-Bing Zhou, Ren-Hao Li, and  
Zhuang-Ping Zhan\*

Department of Chemistry and Key Laboratory for Chemical Biology of Fujian  
Province, College of Chemistry and Chemical Engineering, Xiamen University,  
Xiamen 361005, Fujian, P. R. China

[zpzhan@xmu.edu.cn](mailto:zpzhan@xmu.edu.cn)

## Content

|                                                                                                                                               |     |
|-----------------------------------------------------------------------------------------------------------------------------------------------|-----|
| General Information.....                                                                                                                      | S2  |
| General procedure for synthesis of <i>N</i> -propargylic sulfonylhydrazones <b>1</b> and pyrazolo[5,1- <i>a</i> ]isoquinolines <b>2</b> ..... | S3  |
| Single crystal X-ray structure for <b>2i</b> .....                                                                                            | S4  |
| The HRMS of <b>2n</b> - <sup>18</sup> O .....                                                                                                 | S9  |
| <sup>1</sup> H, <sup>13</sup> C-NMR, IR, MP and MS Data of <b>2a-2g</b> , <b>2i-2s</b> , <b>2v</b> , <b>4v</b> , <b>12a</b> .....             | S10 |
| <sup>1</sup> H, <sup>13</sup> C-NMR Spectra of products <b>2a-2g</b> , <b>2i-2s</b> , <b>2v</b> , <b>4v</b> , <b>12a</b> .....                | S18 |

## General Information

Unless otherwise noted, all reagents and solvents were obtained commercially and used without further purification. *N*-sulfonylhydrazones **1** were prepared according to our previous work. Column chromatography on silica gel (300-400 mesh) was carried out using technical grade 60-90 °C petroleum ether (distilled prior to use) and analytical grade EtOAc (without further purification). <sup>1</sup>H and <sup>13</sup>C spectra were recorded on a 500 MHz or 400 MHz spectrometer. Chemical shifts were reported in ppm. <sup>1</sup>H NMR spectra were referenced to CDCl<sub>3</sub> (7.26 ppm), and <sup>13</sup>C-NMR spectra were referenced to CDCl<sub>3</sub> (77.0 ppm). Peak multiplicities were designated by the following abbreviations: s, singlet; d, doublet; t, triplet; m, multiplet; brs, broad singlet and J, coupling constant in Hz.<sup>1</sup> IR spectra were recorded on an FTIR spectrometer as thin film. Absorptions were given in wavenumbers (cm<sup>-1</sup>). HRMS spectra were recorded with Micromass QTOF2 Quadrupole/Time-of-Flight Tandem mass spectrometer using electron spray ionization.

## General procedure for synthesis of *N*-propargylic sulfonylhydrazones **1** and pyrazolo[5,1-*a*]isoquinolines **2**

General procedure for synthesis of *N*-propargylic sulfonylhydrazones **1**

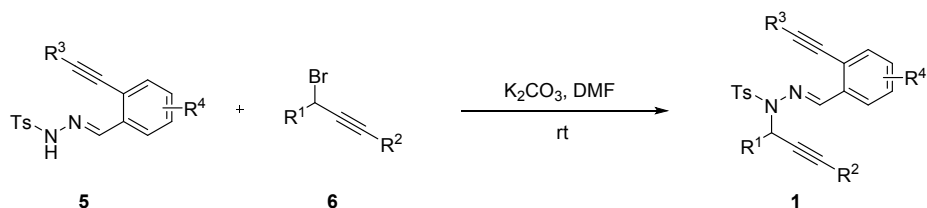

To a solution of *N*-sulfonylhydrazone **5** (2 mmol) and propargyl bromide **6** (2.2 mmol) in DMF (10 mL),  $K_2CO_3$  (2.2 mmol) were slowly added. The reaction mixture was stirred at room temperature, and the reaction progress monitored by TLC. Upon completion, the mixture was filtered off and water (20 mL) was added. The aqueous phase was extracted with  $CH_2Cl_2$  (3×10 mL). The combined organic layers were washed with brine, dried over  $Na_2SO_4$ . The solvent was removed under vacuum, and then the residue was further purified by silica gel column chromatography (petroleum ether and ethyl acetate) to afford propargylic hydrazone **1**.

General procedure for synthesis pyrazolo[5,1-*a*]isoquinolines **2**

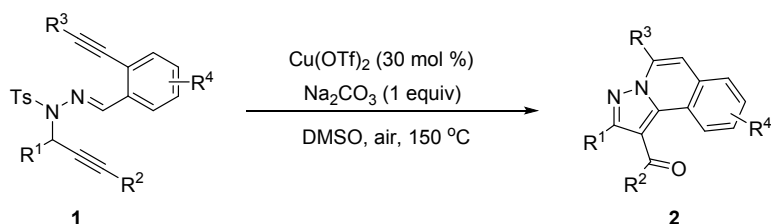

To a solution of *N*-propargylic sulfonylhydrazone **1** (0.5 mmol) and  $Na_2CO_3$  (0.5 mmol) in DMSO (5 mL),  $Cu(OTf)_2$  (0.15 mmol) was added and the mixture was stirred at 150 °C in air. When the reaction was completed (30 min - 1 h, monitored by TLC), water was added to the mixture. The aqueous phase was extracted with  $CH_2Cl_2$  (3×10 mL). The combined organic layers were washed with brine, dried over  $Na_2SO_4$ . The solvent was removed under vacuum, and then the residue was further purified by silica gel column chromatography (petroleum ether and ethyl acetate) to afford product **2**.

## Single crystal X-ray structure for **2i**

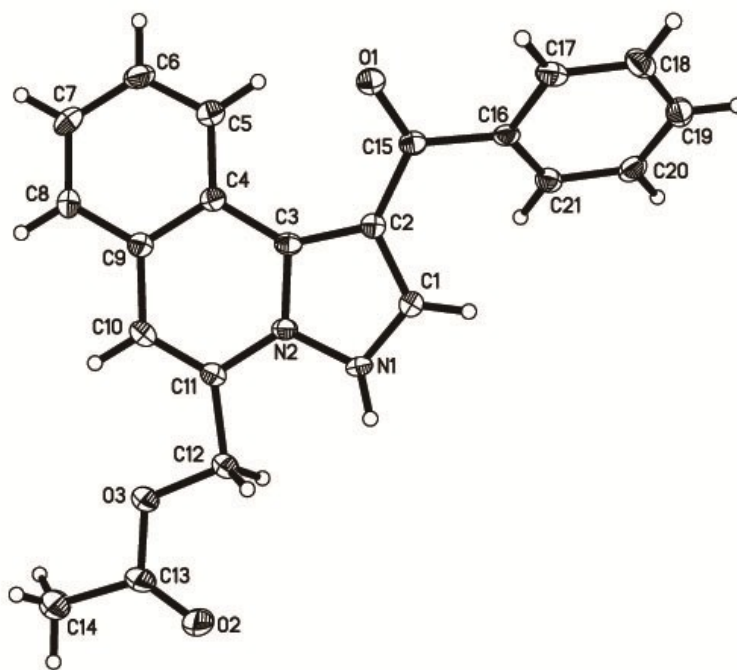

**Figure S1.** Single crystal X-ray structure for **2i** (drawn with 30% probability).

## checkCIF/PLATON report

You have not supplied any structure factors. As a result the full set of tests cannot be run.

THIS REPORT IS FOR GUIDANCE ONLY. IF USED AS PART OF A REVIEW PROCEDURE FOR PUBLICATION, IT SHOULD NOT REPLACE THE EXPERTISE OF AN EXPERIENCED CRYSTALLOGRAPHIC REFEREE.

No syntax errors found.    CIF dictionary    Interpreting this report

### Datablock: tht160623-1

---

|                 |                |                    |              |
|-----------------|----------------|--------------------|--------------|
| Bond precision: | C-C = 0.0047 A | Wavelength=0.71073 |              |
| Cell:           | a=11.0348 (7)  | b=21.2718 (12)     | c=7.2221 (6) |
|                 | alpha=90       | beta=90            | gamma=90     |
| Temperature:    | 184 K          |                    |              |
|                 | Calculated     | Reported           |              |
| Volume          | 1695.2 (2)     | 1695.3 (2)         |              |
| Space group     | P c a 21       | Pca2 (1)           |              |
| Hall group      | P 2c -2ac      | ?                  |              |
| Moiety formula  | C21 H17 N2 O3  | ?                  |              |
| Sum formula     | C21 H17 N2 O3  | C21 H16 N2 O3      |              |
| Mr              | 345.37         | 344.36             |              |
| Dx,g cm-3       | 1.353          | 1.349              |              |
| Z               | 4              | 4                  |              |
| Mu (mm-1)       | 0.092          | 0.092              |              |
| F000            | 724.0          | 720.0              |              |
| F000'           | 724.33         |                    |              |
| h,k,lmax        | 13,25,8        | 13,25,8            |              |
| Nref            | 3013 [ 1644]   | 2770               |              |
| Tmin,Tmax       | 0.982,0.991    | 3.510,             |              |
| Tmin'           | 0.982          |                    |              |

Correction method= # Reported T Limits: Tmin=3.510 Tmax=\*\*\*\*\*  
AbsCorr = MULTI-SCAN

Data completeness= 1.68/0.92      Theta(max)= 25.000

R(reflections)= 0.0634 ( 2472)      wR2(reflections)= 0.1335 ( 2770)

S = 1.200      Npar= 235

---

The following ALERTS were generated. Each ALERT has the format  
**test-name ALERT alert-type alert-level.**  
Click on the hyperlinks for more details of the test.

---

● **Alert level C**

ABSTY02\_ALERT\_1\_C An \_exptl\_absorpt\_correction\_type has been given without a literature citation. This should be contained in the \_exptl\_absorpt\_process\_details field.  
Absorption correction given as multi-scan

STRVA01\_ALERT\_2\_C Chirality of atom sites is inverted?  
From the CIF: \_refine\_ls\_abs\_structure\_Flack 2.000  
From the CIF: \_refine\_ls\_abs\_structure\_Flack\_su 2.000

PLAT041\_ALERT\_1\_C Calc. and Reported SumFormula Strings Differ Please Check  
PLAT043\_ALERT\_1\_C Calculated and Reported Mol. Weight Differ by .. 1.01 Check  
PLAT068\_ALERT\_1\_C Reported F000 Differs from Calcd (or Missing)... Please Check  
PLAT089\_ALERT\_3\_C Poor Data / Parameter Ratio (Zmax < 18) ..... 7.00 Note  
PLAT220\_ALERT\_2\_C Non-Solvent Resd 1 C Ueq(max)/Ueq(min) Range 3.3 Ratio  
PLAT242\_ALERT\_2\_C Low 'MainMol' Ueq as Compared to Neighbors of C13 Check  
PLAT250\_ALERT\_2\_C Large U3/U1 Ratio for Average U(i,j) Tensor .... 2.2 Note  
PLAT340\_ALERT\_3\_C Low Bond Precision on C-C Bonds ..... 0.00467 Ang.  
PLAT420\_ALERT\_2\_C D-H Without Acceptor N1 -- H1A ... Please Check  
PLAT907\_ALERT\_2\_C Flack x > 0.5, Structure needs to be Inverted? . 2.00 Check

---

● **Alert level G**

FORMU01\_ALERT\_2\_G There is a discrepancy between the atom counts in the \_chemical\_formula\_sum and the formula from the \_atom\_site\* data.  
Atom count from \_chemical\_formula\_sum: C21 H16 N2 O3  
Atom count from the \_atom\_site data: C21 H17 N2 O3

CELLZ01\_ALERT\_1\_G Difference between formula and atom\_site contents detected.  
CELLZ01\_ALERT\_1\_G ALERT: Large difference may be due to a symmetry error - see SYMMG tests  
From the CIF: \_cell\_formula\_units\_Z 4  
From the CIF: \_chemical\_formula\_sum C21 H16 N2 O3  
TEST: Compare cell contents of formula and atom\_site data

| atom | Z*formula | cif sites | diff  |
|------|-----------|-----------|-------|
| C    | 84.00     | 84.00     | 0.00  |
| H    | 64.00     | 68.00     | -4.00 |
| N    | 8.00      | 8.00      | 0.00  |
| O    | 12.00     | 12.00     | 0.00  |

PLAT005\_ALERT\_5\_G No Embedded Refinement Details found in the CIF Please Do !  
PLAT007\_ALERT\_5\_G Number of Unrefined Donor-H Atoms ..... 1 Report  
PLAT032\_ALERT\_4\_G Std. Uncertainty on Flack Parameter Value High . 2.000 Report  
PLAT093\_ALERT\_1\_G No s.u.'s on H-positions, Refinement Reported as mixed Check  
PLAT380\_ALERT\_4\_G Incorrectly? Oriented X(sp2)-Methyl Moiety ..... C14 Check  
PLAT899\_ALERT\_4\_G SHELXL97 is Deprecated and Succeeded by SHELXL 2014 Note

---

0 **ALERT level A** = Most likely a serious problem - resolve or explain  
0 **ALERT level B** = A potentially serious problem, consider carefully  
12 **ALERT level C** = Check. Ensure it is not caused by an omission or oversight  
9 **ALERT level G** = General information/check it is not something unexpected

7 **ALERT type 1** CIF construction/syntax error, inconsistent or missing data  
7 **ALERT type 2** Indicator that the structure model may be wrong or deficient  
2 **ALERT type 3** Indicator that the structure quality may be low  
3 **ALERT type 4** Improvement, methodology, query or suggestion  
2 **ALERT type 5** Informative message, check

---

It is advisable to attempt to resolve as many as possible of the alerts in all categories. Often the minor alerts point to easily fixed oversights, errors and omissions in your CIF or refinement strategy, so attention to these fine details can be worthwhile. In order to resolve some of the more serious problems it may be necessary to carry out additional measurements or structure refinements. However, the purpose of your study may justify the reported deviations and the more serious of these should normally be commented upon in the discussion or experimental section of a paper or in the "special\_details" fields of the CIF. checkCIF was carefully designed to identify outliers and unusual parameters, but every test has its limitations and alerts that are not important in a particular case may appear. Conversely, the absence of alerts does not guarantee there are no aspects of the results needing attention. It is up to the individual to critically assess their own results and, if necessary, seek expert advice.

#### **Publication of your CIF in IUCr journals**

A basic structural check has been run on your CIF. These basic checks will be run on all CIFs submitted for publication in IUCr journals (*Acta Crystallographica*, *Journal of Applied Crystallography*, *Journal of Synchrotron Radiation*); however, if you intend to submit to *Acta Crystallographica Section C* or *E* or *IUCrData*, you should make sure that full publication checks are run on the final version of your CIF prior to submission.

#### **Publication of your CIF in other journals**

Please refer to the *Notes for Authors* of the relevant journal for any special instructions relating to CIF submission.

---

PLATON version of 11/08/2016; check.def file version of 04/08/2016

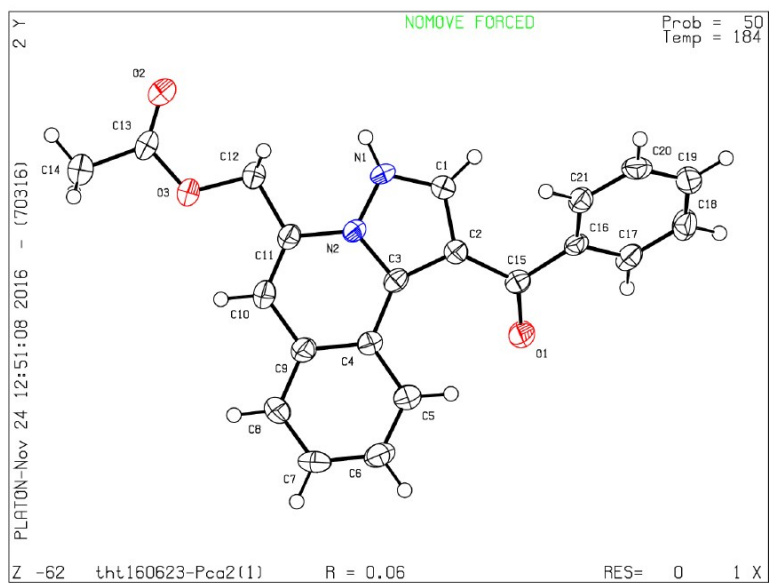



# The HRMS of 2n-<sup>18</sup>O

## Display Report

|                      |                                                                                       |                    |            |
|----------------------|---------------------------------------------------------------------------------------|--------------------|------------|
| <b>Analysis Info</b> | Acquisition Date                                                                      | 3/17/2017 17:10:43 |            |
| Analysis Name        | D:\Data\origin data\Zhanzhuangping\Tanghaitao\20170317\POS_ESI_20170317_D-18_000001.d |                    |            |
| Method               | APEX_Pos_NaFA_400_20100407                                                            | Operator           |            |
| Sample Name          |                                                                                       | Instrument         | apex-Ultra |
| Comment              |                                                                                       |                    |            |

|                              |            |                         |           |                       |                          |
|------------------------------|------------|-------------------------|-----------|-----------------------|--------------------------|
| <b>Acquisition Parameter</b> |            |                         |           |                       |                          |
| Polarity                     | Positive   | Source                  | ESI       | No. of Laser Shots    | 20                       |
| Averaged Scans               | 4          | No. of Cell Fills       | 1         | Laser Power           | 51.0 %                   |
| Broadband Low Mass           | 100.4 m/z  | End Plate               | 3900.0 V  | MALDI Plate           | 300.0 V                  |
| Broadband High Mass          | 3000.0 m/z | Capillary Entrance      | 4400.0 V  | Imaging Spot Diameter | 2000.0 µm                |
| Acquisition Mode             | Single MS  | Skimmer 1               | 36.0 V    |                       |                          |
| Pulse Program                | basic      | Drying Gas Temperature  | 200.0 °C  | Calibration Date      | Mon Feb 13 09:02:11      |
| Source Accumulation          | 0.0 sec    | Drying Gas Flow Rate    | 4.0 L/min | Data Acquisition Size | 2048576                  |
| Ion Accumulation Time        | 1.0 sec    | Nebulizer Gas Flow Rate | 1.0 L/min | Apodization           | Sine-Bell Multiplication |
| Flight Time to Acq. Cell     | 0.0 sec    |                         |           |                       |                          |

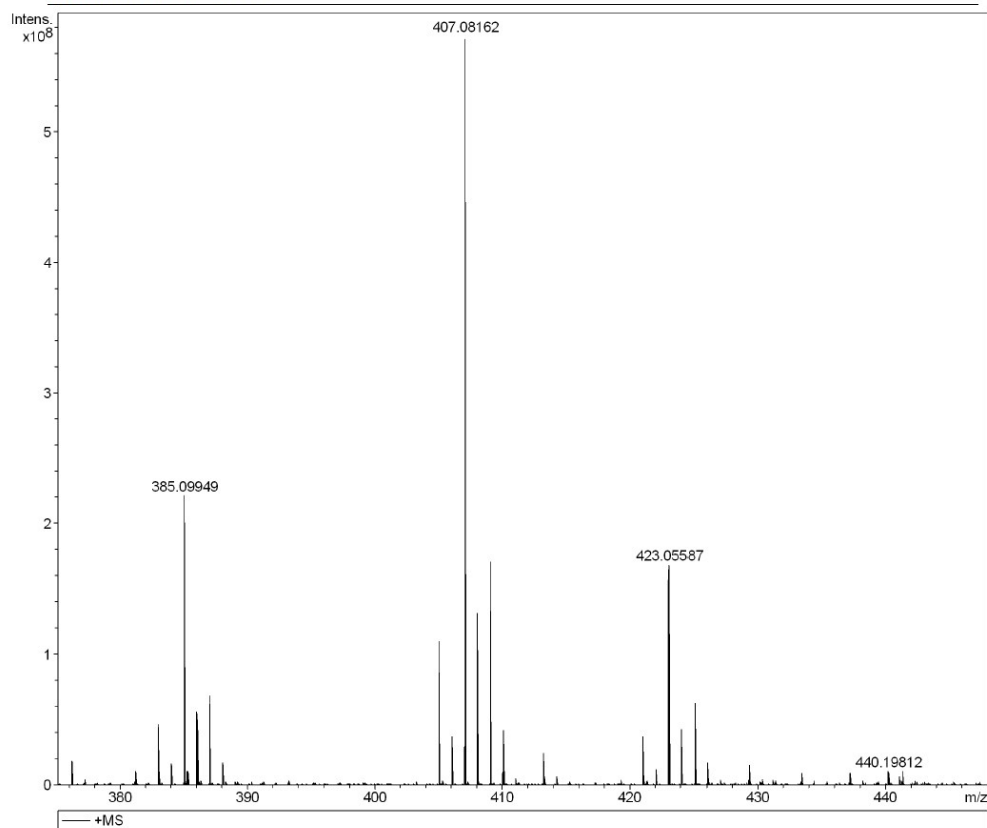

Bruker Compass DataAnalysis 4.0

printed: 3/17/2017 17:12:15

Page 1 of 2

Figure S2. 2n-<sup>18</sup>O HRMS (ESI) *m/z* calcd for C<sub>24</sub>H<sub>15</sub>CIN<sub>2</sub><sup>18</sup>O [M+Na]<sup>+</sup> 407.0808, found: 407.0816.

## **<sup>1</sup>H, <sup>13</sup>C-NMR, IR, MP and MS Data of 2a-2g, 2i-2s, 2v, 4v**

*Phenyl(5-phenylpyrazolo[5,1-a]isoquinolin-1-yl)methanone (2a)*. A white solid (mp: 182-183 °C, Rf = 0.6, petroleum ether/ethyl acetate = 6:1); <sup>1</sup>H NMR (400 MHz, CDCl<sub>3</sub>) δ 7.32 (s, 1H), 7.50-7.58 (m, 5H), 7.59-7.64 (m, 1H), 7.65-7.72 (m, 2H), 7.81-7.88 (m, 3H), 7.96 (d, 2H, *J* = 7.38 Hz), 8.16 (s, 1H), 9.45 (d, 1H, *J* = 7.74 Hz); <sup>13</sup>C NMR (100 MHz, CDCl<sub>3</sub>) δ 115.8, 123.9, 126.9, 127.1, 127.7, 128.4, 128.4, 129.5, 129.7, 129.8, 129.8, 130.9, 132.3, 133.4, 138.3, 139.8, 140.2, 146.2, 190.4; IR (film): 3056, 1645, 1519 cm<sup>-1</sup>; HRMS (ESI) *m/z* calcd for C<sub>24</sub>H<sub>16</sub>N<sub>2</sub>O [M+Na]<sup>+</sup> 371.1155, found: 371.1149.

*(5-(4-Bromophenyl)pyrazolo[5,1-a]isoquinolin-1-yl)(phenyl)methanone (2b)*. A yellow solid (mp: 212-213 °C, Rf = 0.4, petroleum ether/ethyl acetate = 6:1); <sup>1</sup>H NMR (500 MHz, CDCl<sub>3</sub>) δ 7.30 (s, 1H), 7.50-7.55 (m, 2H), 7.59-7.63 (m, 1H), 7.65-7.71 (m, 4H), 7.72-7.76 (m, 2H), 7.80-7.84 (m, 1H), 7.92-7.97 (m, 2H), 8.14 (s, 1H), 9.42 (d, 1H, *J* = 7.97 Hz); <sup>13</sup>C NMR (125 MHz, CDCl<sub>3</sub>) δ 115.8, 116.0, 123.9, 124.0, 126.9, 127.2, 127.9, 128.4, 129.7, 129.9, 130.7, 131.3, 131.7, 132.2, 132.4, 137.1, 139.8, 140.1, 146.1, 190.3; IR (film): 3058, 1639, 1520 cm<sup>-1</sup>; HRMS (ESI) *m/z* calcd for C<sub>24</sub>H<sub>15</sub>BrN<sub>2</sub>O [M+Na]<sup>+</sup> 449.0260 and 451.0240, found: 449.0258 and 451.0238.

*Phenyl(5-(p-tolyl)pyrazolo[5,1-a]isoquinolin-1-yl)methanone (2c)*. A white solid (mp: 184-185 °C, Rf = 0.7, petroleum ether/ethyl acetate = 6:1); <sup>1</sup>H NMR (400 MHz, CDCl<sub>3</sub>) δ 2.46 (s, 3H), δ 7.30 (s, 1H), 7.36 (d, 2H, *J* = 7.92 Hz), 7.49-7.56 (m, 2H), 7.58-7.70 (m, 3H), 7.72-7.76 (m, 2H), 7.79-7.85 (m, 1H), 7.91-8.00 (m, 2H), 8.15 (s, 1H), 9.44 (d, 1H, *J* = 7.90 Hz); <sup>13</sup>C NMR (100 MHz, CDCl<sub>3</sub>) δ 21.4, 115.5, 115.8,

123.8, 126.9, 127.0, 127.5, 128.4, 129.1, 129.6, 129.8, 130.5, 131.0, 132.3, 138.4, 139.6, 139.8, 140.2, 146.2, 190.4; IR (film): 3061, 1642, 1508  $\text{cm}^{-1}$ ; HRMS (ESI)  $m/z$  calcd for  $\text{C}_{25}\text{H}_{18}\text{N}_2\text{O}$   $[\text{M}+\text{Na}]^+$  385.1311, found: 385.1308.

*(5-(4-Methoxyphenyl)pyrazolo[5,1-*a*]isoquinolin-1-yl)(phenyl)methanone (2d)*. A white solid (mp: 195-196  $^{\circ}\text{C}$ , Rf = 0.5, petroleum ether/ethyl acetate = 5:1);  $^1\text{H}$  NMR (500 MHz,  $\text{CDCl}_3$ )  $\delta$  3.90 (s, 3H),  $\delta$  7.05-7.09 (m, 2H), 7.28 (s, 1H), 7.50-7.54 (m, 2H), 7.59-7.70 (m, 3H), 7.78-7.84 (m, 3H), 7.93-7.97 (m, 2H), 8.15 (s, 1H), 9.43 (d, 1H,  $J = 8.15$  Hz);  $^{13}\text{C}$  NMR (125 MHz,  $\text{CDCl}_3$ )  $\delta$  55.4, 113.9, 115.3, 115.8, 123.8, 125.8, 126.9, 127.0, 127.5, 128.4, 129.8, 131.1, 132.3, 138.2, 139.8, 140.3, 146.2, 160.6, 190.4; IR (film): 3058, 1640, 1511  $\text{cm}^{-1}$ ; HRMS (ESI)  $m/z$  calcd for  $\text{C}_{25}\text{H}_{18}\text{N}_2\text{O}_2$   $[\text{M}+\text{Na}]^+$  401.1260, found: 401.1256.

*(5-(4-Ethylphenyl)pyrazolo[5,1-*a*]isoquinolin-1-yl)(phenyl)methanone (2e)*. A white solid (mp: 179-180  $^{\circ}\text{C}$ , Rf = 0.7, petroleum ether/ethyl acetate = 6:1);  $^1\text{H}$  NMR (500 MHz,  $\text{CDCl}_3$ )  $\delta$  1.32 (t, 3H,  $J = 7.62$  Hz),  $\delta$  2.77 (q, 2H,  $J = 7.60$  Hz), 7.31 (s, 1H), 7.38-7.41 (m, 2H), 7.50-7.54 (m, 2H), 7.59-7.70 (m, 3H), 7.75-7.79 (m, 2H), 7.80-7.84 (m, 1H), 7.93-7.98 (m, 2H), 8.16 (s, 1H), 9.44 (m, 1H);  $^{13}\text{C}$  NMR (125 MHz,  $\text{CDCl}_3$ )  $\delta$  15.3, 28.8, 115.6, 115.8, 123.8, 126.9, 127.0, 127.5, 128.0, 128.4, 129.6, 129.8, 130.7, 131.0, 132.3, 138.4, 139.8, 140.2, 145.9, 146.2, 190.4; IR (film): 3055, 1642, 1508  $\text{cm}^{-1}$ ; HRMS (ESI)  $m/z$  calcd for  $\text{C}_{26}\text{H}_{20}\text{N}_2\text{O}$   $[\text{M}+\text{Na}]^+$  399.1468, found: 399.1465.

*Phenyl(5-(*m*-tolyl)pyrazolo[5,1-*a*]isoquinolin-1-yl)methanone (2f)*. A white solid (mp: 185-186  $^{\circ}\text{C}$ , Rf = 0.6, petroleum ether/ethyl acetate = 6:1);  $^1\text{H}$  NMR (400 MHz,

CDCl<sub>3</sub>) δ 2.47 (s, 3H), 7.30 (s, 1H), 7.32-7.36 (m, 1H), 7.42-7.48 (m, 1H), 7.50-7.55 (m, 2H), 7.58-7.71 (m, 5H), 7.80-7.85 (m, 1H), 7.93-7.98 (m, 2H), 8.15 (s, 1H), 9.45 (d, 1H, *J* = 7.86 Hz); <sup>13</sup>C NMR (100 MHz, CDCl<sub>3</sub>) δ 21.5, 115.8, 115.8, 123.9, 126.8, 126.9, 127.1, 127.6, 128.3, 128.4, 129.8, 130.2, 130.3, 131.0, 132.3, 133.4, 138.2, 138.5, 139.8, 140.2, 146.3, 190.4; IR (film): 3055, 1643, 1518 cm<sup>-1</sup>; HRMS (ESI) *m/z* calcd for C<sub>25</sub>H<sub>18</sub>N<sub>2</sub>O [M+Na]<sup>+</sup> 385.1311, found: 385.1308.

(*Phenyl(5-(thiophen-3-yl)pyrazolo[5,1-*a*]isoquinolin-1-yl)methanone (2g)*). A white solid (mp: 167-168 °C, R<sub>f</sub> = 0.6, petroleum ether/ethyl acetate = 5:1); <sup>1</sup>H NMR (400 MHz, CDCl<sub>3</sub>) δ 7.48-7.56 (m, 4H), 7.60-7.67 (m, 2H), 7.67-7.71 (m, 1H), 7.72-7.76 (m, 1H), 7.81-7.85 (m, 1H), 7.94-7.97 (m, 2H), 8.20 (s, 1H), 8.26-8.30 (m, 1H), 9.41 (d, 1H, *J* = 8.05 Hz); <sup>13</sup>C NMR (100 MHz, CDCl<sub>3</sub>) δ 114.9, 115.8, 123.6, 125.5, 126.8, 127.0, 127.3, 127.7, 128.2, 128.4, 129.8, 129.8, 130.8, 132.4, 133.3, 133.4, 139.9, 140.2, 146.1, 190.5; IR (film): 3051, 1638, 1507 cm<sup>-1</sup>; HRMS (ESI) *m/z* calcd for C<sub>22</sub>H<sub>14</sub>N<sub>2</sub>OS [M+Na]<sup>+</sup> 377.0719, found: 377.0716.

(*1-Benzoylpyrazolo[5,1-*a*]isoquinolin-5-yl)methyl acetate (2i)*). A white solid (mp: 138-139 °C, R<sub>f</sub> = 0.5, petroleum ether/ethyl acetate = 5:1); <sup>1</sup>H NMR (400 MHz, CDCl<sub>3</sub>) δ 2.21 (s, 3H), 5.70 (s, 2H), 7.38 (s, 1H), 7.51-7.55 (m, 2H), 7.60-7.72 (m, 3H), 7.81-7.85 (m, 1H), 7.91-7.95 (m, 2H), 8.19 (s, 1H), 9.42 (d, 1H, *J* = 7.81 Hz); <sup>13</sup>C NMR (100 MHz, CDCl<sub>3</sub>) δ 20.9, 60.8, 114.8, 116.0, 124.2, 127.0, 127.2, 128.1, 128.4, 129.7, 129.8, 130.2, 132.3, 132.7, 139.3, 140.1, 146.4, 170.4, 190.3; IR (film): 3061, 1745, 1642, 1520 cm<sup>-1</sup>; HRMS (ESI) *m/z* calcd for C<sub>21</sub>H<sub>16</sub>N<sub>2</sub>O<sub>3</sub> [M+Na]<sup>+</sup> 367.1053, found: 367.1050.

*(5-Cyclopropylpyrazolo[5,1-*a*]isoquinolin-1-yl)(phenyl)methanone (2j)*. A white solid (mp: 112-115 °C, Rf = 0.6, petroleum ether/ethyl acetate = 6:1); <sup>1</sup>H NMR (500 MHz, CDCl<sub>3</sub>) δ 0.94-0.98 (m, 2H), 1.21-1.26 (m, 2H), 2.71-2.79 (m, 1H), 6.93 (s, 1H), 7.50-7.54 (m, 2H), 7.56-7.65 (m, 3H), 7.69-7.73 (m, 1H), 7.92-8.00 (m, 2H), 8.21 (s, 1H), 9.40 (d, 1H, *J* = 8.26 Hz); <sup>13</sup>C NMR (125 MHz, CDCl<sub>3</sub>) δ 7.3, 11.7, 110.3, 115.9, 123.2, 126.4, 126.8, 126.9, 128.3, 129.5, 129.7, 131.0, 132.2, 139.4, 140.3, 140.6, 146.2, 190.4; IR (film): 3058, 2917, 1645, 1514 cm<sup>-1</sup>; HRMS (ESI) *m/z* calcd for C<sub>21</sub>H<sub>16</sub>N<sub>2</sub>O [M+Na]<sup>+</sup> 335.1155, found: 335.1151.

*(5-Pentylpyrazolo[5,1-*a*]isoquinolin-1-yl)(phenyl)methanone (2k)*. A yellow solid (mp: 59-60 °C, Rf = 0.7, petroleum ether/ethyl acetate = 6:1); <sup>1</sup>H NMR (500 MHz, CDCl<sub>3</sub>) δ 0.94 (t, 3H, *J* = 7.14 Hz), 1.40-1.50 (m, 4H), 1.88-1.94 (m, 2H), 3.22 (t, 2H, *J* = 7.68 Hz), 7.09 (s, 1H), 7.50-7.54 (m, 2H), 7.57-7.65 (m, 3H), 7.72-7.75 (m, 1H), 7.92-7.96 (m, 2H), 8.16 (s, 1H), 9.42 (d, 1H, *J* = 8.17 Hz); <sup>13</sup>C NMR (125 MHz, CDCl<sub>3</sub>) δ 14.0, 22.4, 26.7, 31.2, 31.5, 113.0, 115.7, 123.3, 126.3, 126.8, 126.8, 128.3, 129.5, 129.7, 130.9, 132.1, 139.3, 139.4, 140.3, 146.1, 190.3; IR (film): 3056, 2955, 1648, 1517 cm<sup>-1</sup>; HRMS (ESI) *m/z* calcd for C<sub>23</sub>H<sub>22</sub>N<sub>2</sub>O [M+Na]<sup>+</sup> 365.1624, found: 365.1621.

*(2-Methyl-5-phenylpyrazolo[5,1-*a*]isoquinolin-1-yl)(phenyl)methanone (2l)*. A yellow solid (mp: 55-56 °C, Rf = 0.7, petroleum ether/ethyl acetate = 7:1); <sup>1</sup>H NMR (400 MHz, CDCl<sub>3</sub>) δ 2.28 (s, 3H), 7.16 (s, 1H), 7.36-7.41 (m, 1H), 7.45-7.62 (m, 7H), 7.72-7.77 (m, 1H), 7.90-7.96 (m, 4H), 8.22 (d, 1H, *J* = 8.24 Hz); <sup>13</sup>C NMR (100 MHz, CDCl<sub>3</sub>) δ 14.2, 114.0, 123.0, 125.3, 127.2, 127.2, 128.3, 128.7, 129.4, 129.7, 129.7,

130.5, 133.1, 133.5, 137.9, 138.9, 139.4, 151.1, 193.6; IR (film): 3058, 1642, 1526  $\text{cm}^{-1}$ ; HRMS (ESI)  $m/z$  calcd for  $\text{C}_{25}\text{H}_{18}\text{N}_2\text{O}$   $[\text{M}+\text{Na}]^+$  385.1311, found: 385.1307.

*(2-Ethyl-5-phenylpyrazolo[5,1-a]isoquinolin-1-yl)(phenyl)methanone (2m)*. A white solid (mp: 51-52 °C, Rf = 0.7, petroleum ether/ethyl acetate = 7:1);  $^1\text{H}$  NMR (400 MHz,  $\text{CDCl}_3$ )  $\delta$  1.18 (t, 3H,  $J = 7.55$  Hz), 2.68 (q, 2H,  $J = 7.54$  Hz), 7.15 (s, 1H), 7.32-7.38 (m, 1H), 7.44-7.56 (m, 6H), 7.57-7.62 (m, 1H), 7.71-7.75 (m, 1H), 7.93-7.98 (m, 4H), 8.08 (d, 1H,  $J = 8.30$  Hz);  $^{13}\text{C}$  NMR (100 MHz,  $\text{CDCl}_3$ )  $\delta$  14.0, 21.5, 113.1, 113.8, 123.1, 125.2, 127.2, 127.2, 128.3, 128.6, 128.7, 129.4, 129.7, 129.8, 130.5, 133.2, 133.6, 138.0, 138.6, 139.3, 156.2, 193.9; IR (film): 3061, 2965, 1649, 1530  $\text{cm}^{-1}$ ; HRMS (ESI)  $m/z$  calcd for  $\text{C}_{26}\text{H}_{20}\text{N}_2\text{O}$   $[\text{M}+\text{Na}]^+$  399.1468, found: 399.1465.

*(9-Chloro-5-phenylpyrazolo[5,1-a]isoquinolin-1-yl)(phenyl)methanone (2n)*. A white solid (mp: 199-200 °C, Rf = 0.6, petroleum ether/ethyl acetate = 5:1);  $^1\text{H}$  NMR (400 MHz,  $\text{CDCl}_3$ )  $\delta$  7.27 (s, 1H), 7.50-7.56 (m, 5H), 7.59-7.65 (m, 2H), 7.73-7.77 (m, 1H), 7.82-7.86 (m, 2H), 7.91-7.95 (m, 2H), 8.17 (s, 1H), 9.56 (d, 1H,  $J = 1.66$  Hz);  $^{13}\text{C}$  NMR (100 MHz,  $\text{CDCl}_3$ )  $\delta$  115.1, 116.1, 124.8, 126.3, 128.4, 128.4, 129.2, 129.6, 130.4, 132.4, 133.0, 130.4, 133.6, 138.6, 138.8, 140.0, 146.4, 190.2; IR (film): 3064, 1642, 1517  $\text{cm}^{-1}$ ; HRMS (ESI)  $m/z$  calcd for  $\text{C}_{24}\text{H}_{15}\text{ClN}_2\text{O}$   $[\text{M}+\text{Na}]^+$  405.0765, found: 405.0761.

*(9-Methoxy-5-phenylpyrazolo[5,1-a]isoquinolin-1-yl)(phenyl)methanone (2o)*. A white solid (mp: 192-193 °C, Rf = 0.5, petroleum ether/ethyl acetate = 5:1);  $^1\text{H}$  NMR (400 MHz,  $\text{CDCl}_3$ )  $\delta$  4.02 (s, 3H), 7.28 (s, 1H), 7.29-7.34 (m, 1H), 7.48-7.63 (m, 6H),

7.70-7.75 (m, 1H), 7.81-7.95(m, 4H), 8.15 (s, 1H), 9.14 (d, 1H,  $J = 2.2$  Hz);  $^{13}\text{C}$  NMR (100 MHz,  $\text{CDCl}_3$ )  $\delta$  55.8, 107.4, 115.6, 115.7, 121.1, 125.3, 125.3, 128.3, 128.4, 128.4, 129.3, 129.6, 129.7, 132.0, 133.6, 136.1, 139.5, 140.7, 146.8, 159.0, 190.6; IR (film): 3098, 1639, 1520  $\text{cm}^{-1}$ ; HRMS (ESI)  $m/z$  calcd for  $\text{C}_{25}\text{H}_{18}\text{N}_2\text{O}_2$   $[\text{M}+\text{Na}]^+$  401.1260, found: 401.1256.

*(8-Methyl-5-phenylpyrazolo[5,1-*a*]isoquinolin-1-yl)(phenyl)methanone (2p)*. A white solid (mp: 142-143 °C,  $R_f = 0.7$ , petroleum ether/ethyl acetate = 6:1);  $^1\text{H}$  NMR (400 MHz,  $\text{CDCl}_3$ )  $\delta$  2.56 (s, 3H), 7.25 (s, 1H), 7.47-7.56 (m, 6H), 7.58-7.63 (m, 2H), 7.81-7.86 (m, 2H), 7.92-7.98(m, 2H), 8.14 (s, 1H), 9.37 (d, 1H,  $J = 8.4$  Hz);  $^{13}\text{C}$  NMR (100 MHz,  $\text{CDCl}_3$ )  $\delta$  21.7, 115.4, 115.6, 121.8, 126.7, 126.9, 128.3, 128.4, 129.4, 129.5, 129.7, 129.7, 131.2, 132.2, 133.5, 138.2, 139.9, 140.2, 140.3, 146.3, 190.3; IR (film): 3058, 1645, 1517  $\text{cm}^{-1}$ ; HRMS (ESI)  $m/z$  calcd for  $\text{C}_{25}\text{H}_{18}\text{N}_2\text{O}$   $[\text{M}+\text{Na}]^+$  385.1311, found: 385.1308.

*Naphthalen-1-yl(5-phenylpyrazolo[5,1-*a*]isoquinolin-1-yl)methanone (2q)*. A white solid (mp: 85-86 °C,  $R_f = 0.5$ , petroleum ether/ethyl acetate = 5:1);  $^1\text{H}$  NMR (500 MHz,  $\text{CDCl}_3$ )  $\delta$  7.37 (s, 1H), 7.51-7.56 (m, 6H), 7.74-7.78 (m, 3H), 7.83-7.88 (m, 3H), 7.94-7.97 (m, 2H), 8.00-8.04 (m, 1H), 8.32-8.38 (m, 1H), 9.98-10.02 (m, 1H);  $^{13}\text{C}$  NMR (125 MHz,  $\text{CDCl}_3$ )  $\delta$  116.2, 118.0, 124.1, 124.4, 125.7, 126.4, 127.0, 127.2, 127.5, 127.8, 127.8, 128.3, 129.5, 129.7, 130.1, 130.9, 131.1, 131.2, 133.3, 133.8, 138.3, 138.8, 139.9, 147.6, 191.2; IR (film): 3055, 1642, 1514  $\text{cm}^{-1}$ ; HRMS (ESI)  $m/z$  calcd for  $\text{C}_{28}\text{H}_{18}\text{N}_2\text{O}$   $[\text{M}+\text{Na}]^+$  421.1311, found: 421.1307.

*(4-Chlorophenyl)(5-phenylpyrazolo[5,1-*a*]isoquinolin-1-yl)methanone (2r)*. A

white solid (mp: 166-167 °C, Rf = 0.4, petroleum ether/ethyl acetate = 5:1); <sup>1</sup>H NMR (400 MHz, CDCl<sub>3</sub>) δ 7.32 (s, 1H), 7.47-7.51 (m, 2H), 7.52-7.58 (m, 3H), 7.63-7.72 (m, 2H), 7.80-7.90 (m, 5H), 8.12 (s, 1H), 9.40 (d, 1H, *J* = 7.9 Hz); <sup>13</sup>C NMR (100 MHz, CDCl<sub>3</sub>) δ 115.5, 116.0, 123.8, 126.8, 127.1, 127.7, 128.4, 128.7, 129.6, 129.7, 129.9, 131.0, 131.1, 133.3, 138.3, 138.5, 138.6, 139.8, 145.9, 188.9; IR (film): 3058, 1642, 1517 cm<sup>-1</sup>; HRMS (ESI) *m/z* calcd for C<sub>24</sub>H<sub>15</sub>ClN<sub>2</sub>O [M+Na]<sup>+</sup> 405.0765, found: 405.0761.

*(5-Phenylpyrazolo[5,1-*a*]isoquinolin-1-yl)(*p*-tolyl)methanone (2s).* A white solid (mp:142-143 °C, Rf = 0.6, petroleum ether/ethyl acetate = 6:1); <sup>1</sup>H NMR (400 MHz, CDCl<sub>3</sub>) δ 2.44 (s, 3H), 7.31 (s, 1H), 7.38-7.44 (m, 2H), 7.52-7.59 (m, 3H), 7.63-7.71 (m, 2H), 7.72-7.79 (m, 2H), 7.81-7.88 (m, 3H), 8.17 (s, 1H), 9.44(d, 1H, *J* = 7.6 Hz); <sup>13</sup>C NMR (100 MHz, CDCl<sub>3</sub>) δ 21.3, 115.8, 115.9, 123.9, 126.9, 127.1, 127.7, 128.2, 128.4, 129.5, 129.7, 129.8, 130.3, 130.9, 133.1, 138.2, 138.3, 139.7, 140.1, 146.2, 190.6; IR (film): 3055, 1642, 1517 cm<sup>-1</sup>; HRMS (ESI) *m/z* calcd for C<sub>25</sub>H<sub>18</sub>N<sub>2</sub>O [M+Na]<sup>+</sup> 385.1311, found: 385.1308.

*(9-Chloro-5-phenylpyrazolo[5,1-*a*]isoquinolin-1-yl)(*p*-tolyl)methanone (2v).* A white solid (mp: 135-136 °C, Rf = 0.5, petroleum ether/ethyl acetate = 5:1); <sup>1</sup>H NMR (400 MHz, CDCl<sub>3</sub>) δ 2.47 (s, 3H), 7.27 (s, 1H), 7.30-7.35 (m, 2H), 7.50-7.59 (m, 3H), 7.61-7.66 (m, 1H), 7.72-7.78 (m, 1H), 7.80-7.88 (m, 4H), 8.17 (s, 1H), 9.48 (d, 1H, *J* = 1.4 Hz); <sup>13</sup>C NMR (100 MHz, CDCl<sub>3</sub>) δ 21.6, 115.0, 116.3, 124.9, 126.3, 128.4, 128.5, 129.1, 129.6, 129.7, 130.0, 130.3, 133.1, 133.6, 137.3, 138.6, 138.7, 143.3, 146.2, 190.0; IR (film): 3052, 1642, 1524 cm<sup>-1</sup>; HRMS (ESI) *m/z* calcd for



C<sub>25</sub>H<sub>17</sub>ClN<sub>2</sub>O [M+Na]<sup>+</sup> 419.0922, found: 419.0920.

*9-Chloro-1-(methoxy(p-tolyl)methyl)-5-phenylpyrazolo[5,1-a]isoquinoline (4v)* A colourless liquid (R<sub>f</sub> = 0.4, petroleum ether/ethyl acetate = 5:1); <sup>1</sup>H NMR (400 MHz, CDCl<sub>3</sub>) δ 2.39 (s, 3H), 3.54 (s, 3H), 5.85 (s, 1H), 7.02 (s, 1H), 7.20-7.26 (m, 2H), 7.40-7.44 (m, 2H), 7.46-7.55 (m, 4H), 7.63-7.68 (m, 2H), 7.79-7.88 (m, 2H), 8.30-8.38 (m, 1H); <sup>13</sup>C NMR (100 MHz, CDCl<sub>3</sub>) δ 21.1, 56.5, 78.3, 112.4, 116.8, 124.7, 125.3, 127.4, 128.0, 128.1, 128.3, 129.2, 129.4, 133.0, 133.5, 134.9, 136.6, 137.7, 138.8, 141.7; IR (film): 3055, 2923, 1598 cm<sup>-1</sup>; HRMS (ESI) m/z calcd for C<sub>26</sub>H<sub>21</sub>ClN<sub>2</sub>O [M+Na]<sup>+</sup> 435.1235, found: 435.1233.

*3-phenylisoquinoline (12a)* This compound is known (CAS: 37993-76-3). <sup>1</sup>H NMR (400 MHz, CDCl<sub>3</sub>) δ 7.43-7.48 (m, 1H), 7.51-7.61 (m, 3H), 7.66-7.74 (m, 1H), 7.85-7.90 (m, 1H), 7.97-8.02 (m, 1H), 8.08 (s, 1H), 8.14-8.20 (m, 2H) 9.37 (s, 1H); <sup>13</sup>C NMR (100 MHz, CDCl<sub>3</sub>) δ 116.4, 126.8, 126.9, 127.0, 127.5, 127.7, 128.4, 128.7, 130.4, 136.6, 139.5, 151.2, 152.3.

# $^1\text{H}$ , $^{13}\text{C}$ -NMR Spectra of products 2a-2g, 2i-2s, 2v, 4v

## Phenyl(5-phenylpyrazolo[5,1-a]isoquinolin-1-yl)methanone (2a)

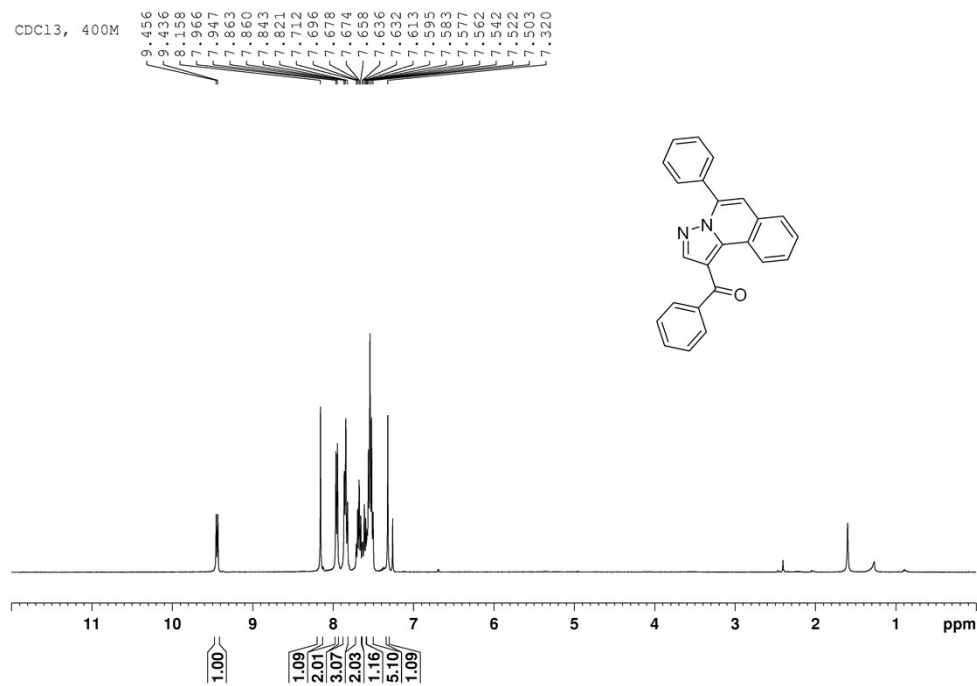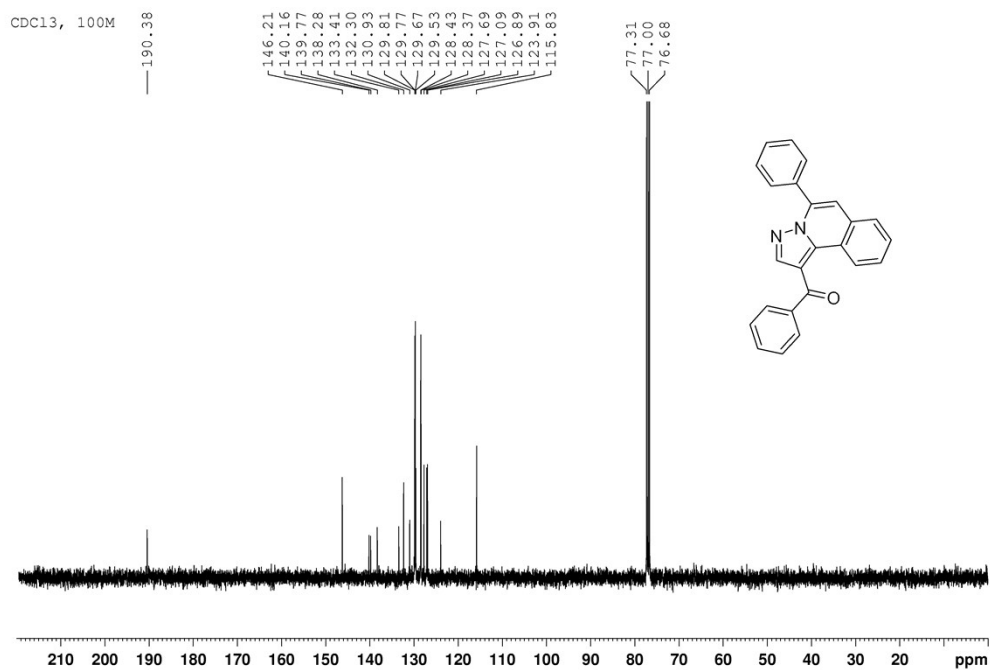

(5-(4-Bromophenyl)pyrazolo[5,1-a]isoquinolin-1-yl)(phenyl)methanone (**2b**)

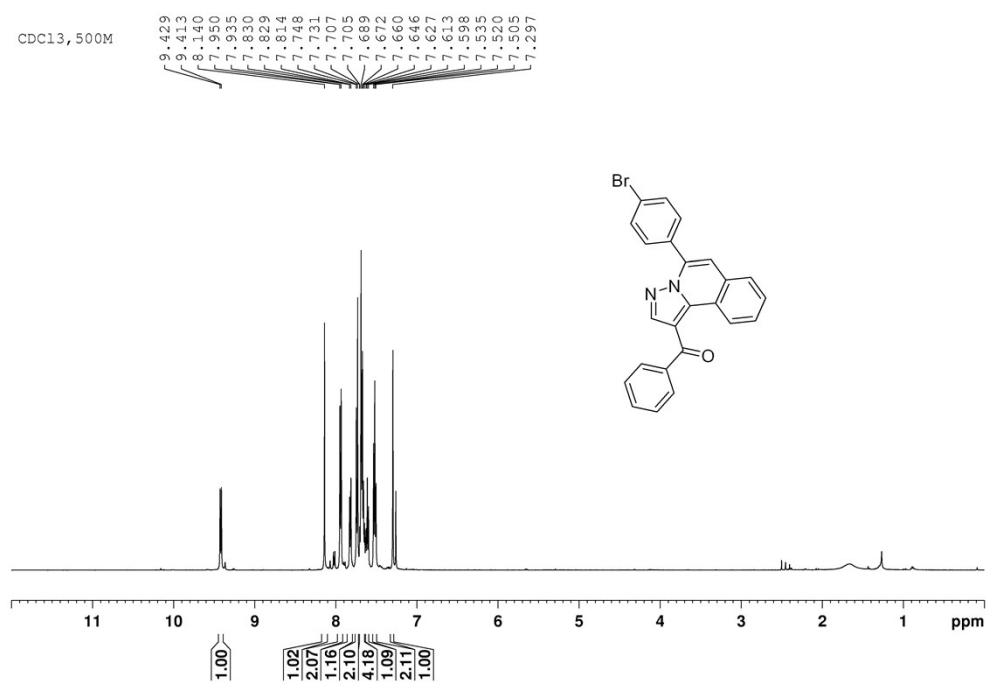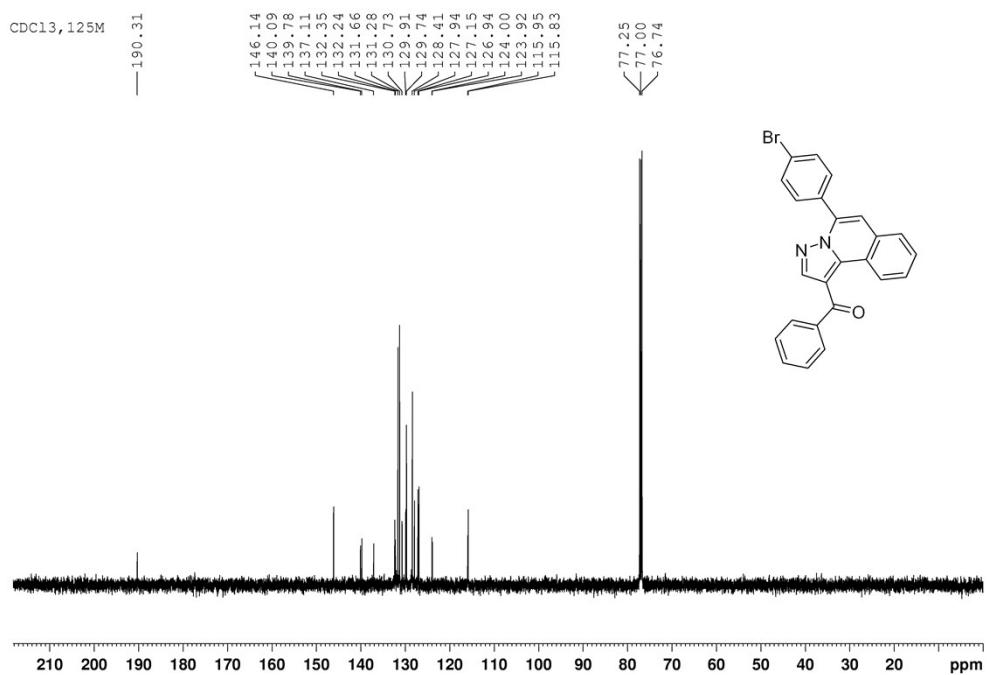

Phenyl(5-(p-tolyl)pyrazolo[5,1-a]isoquinolin-1-yl)methanone (**2c**)

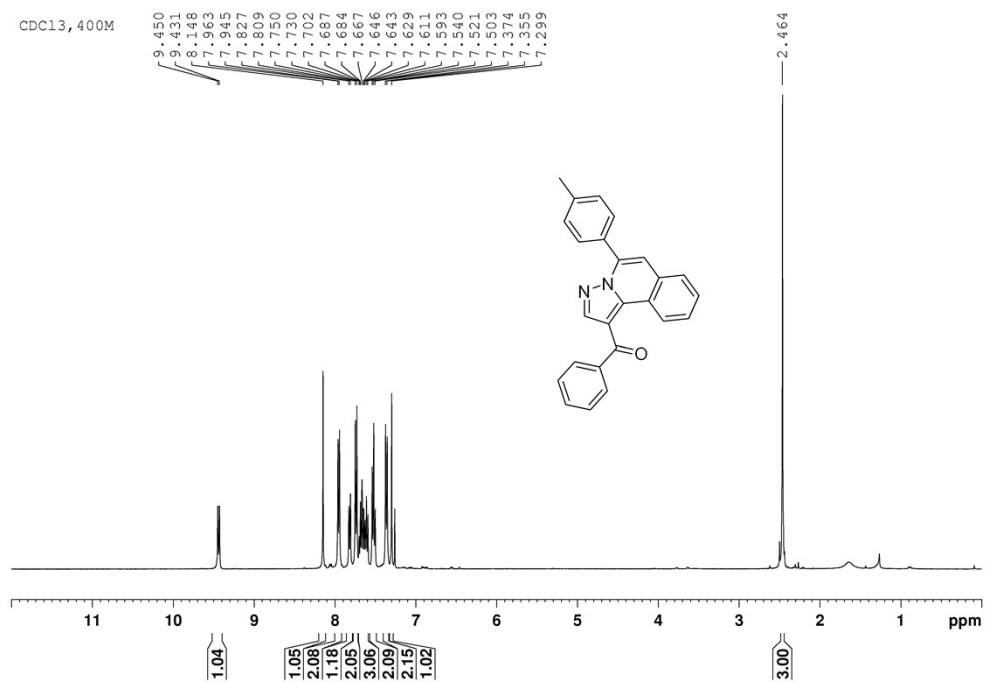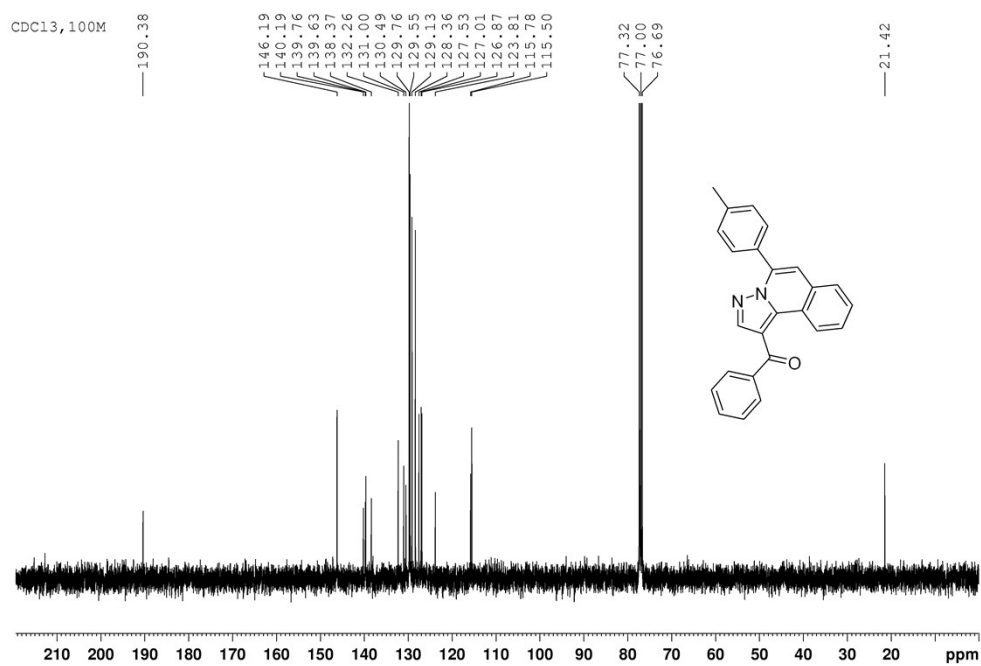

(5-(4-Methoxyphenyl)pyrazolo[5,1-a]isoquinolin-1-yl)(phenyl)methanone (**2d**)

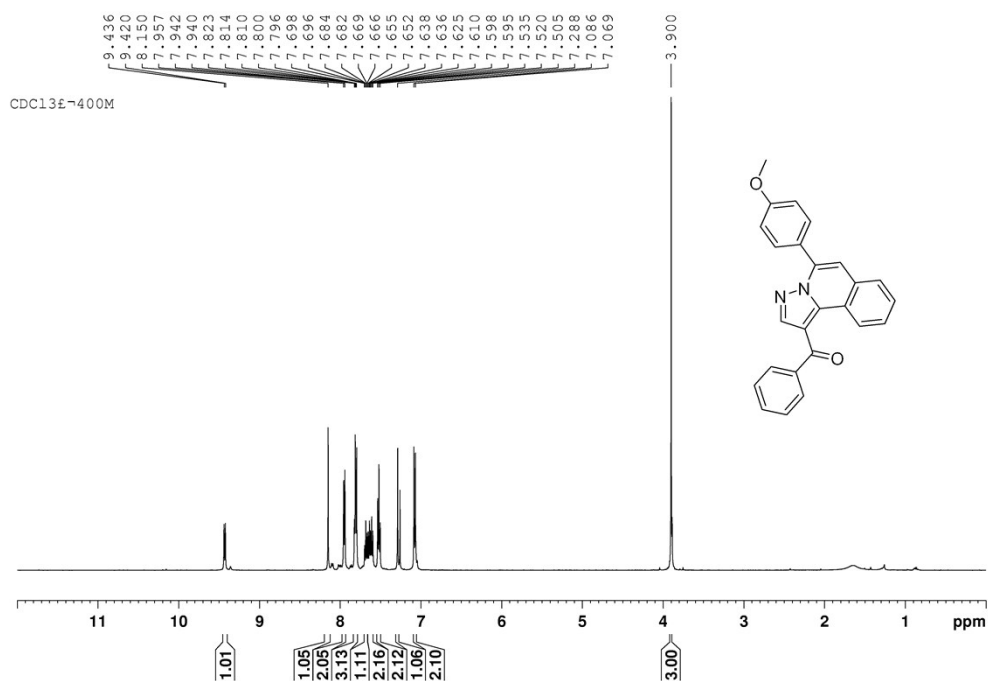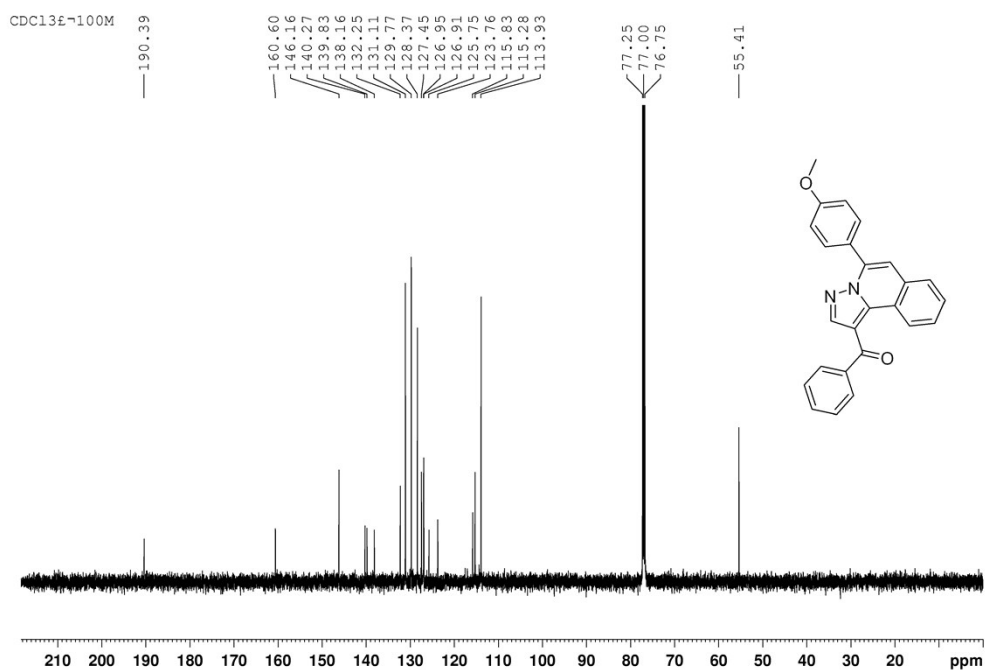

(5-(4-Ethylphenyl)pyrazolo[5,1-a]isoquinolin-1-yl)(phenyl)methanone (**2e**)

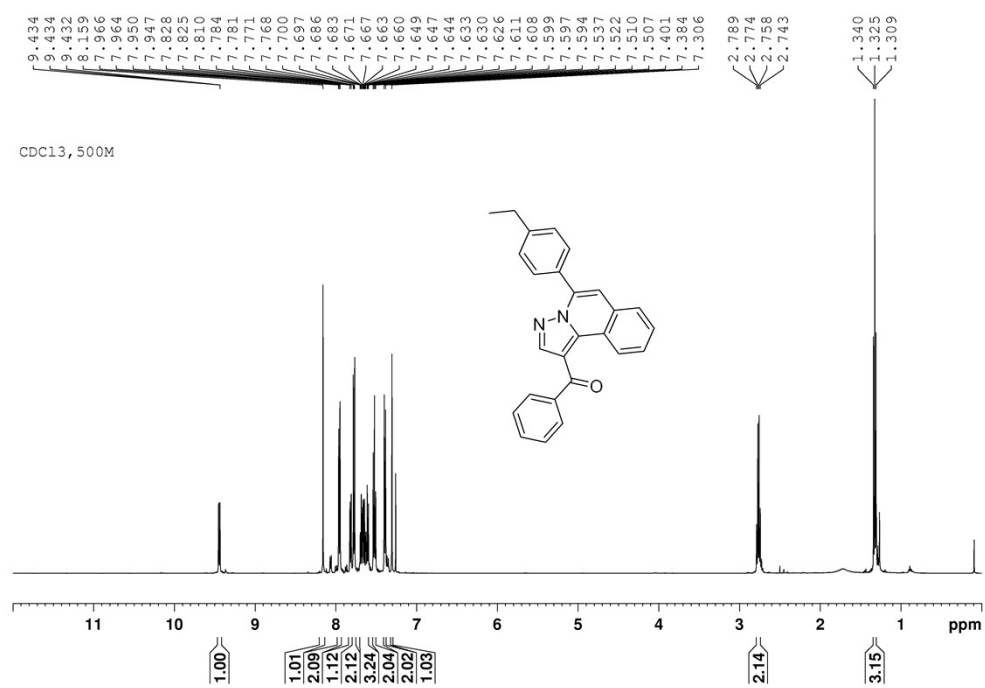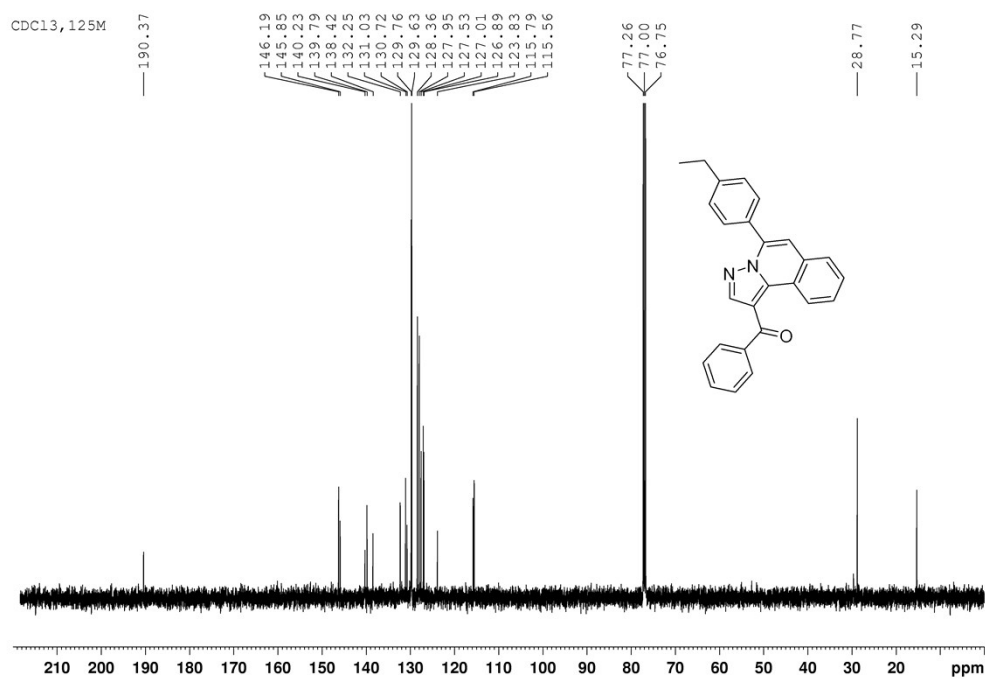

Phenyl(5-(m-tolyl)pyrazolo[5,1-a]isoquinolin-1-yl)methanone (**2f**)

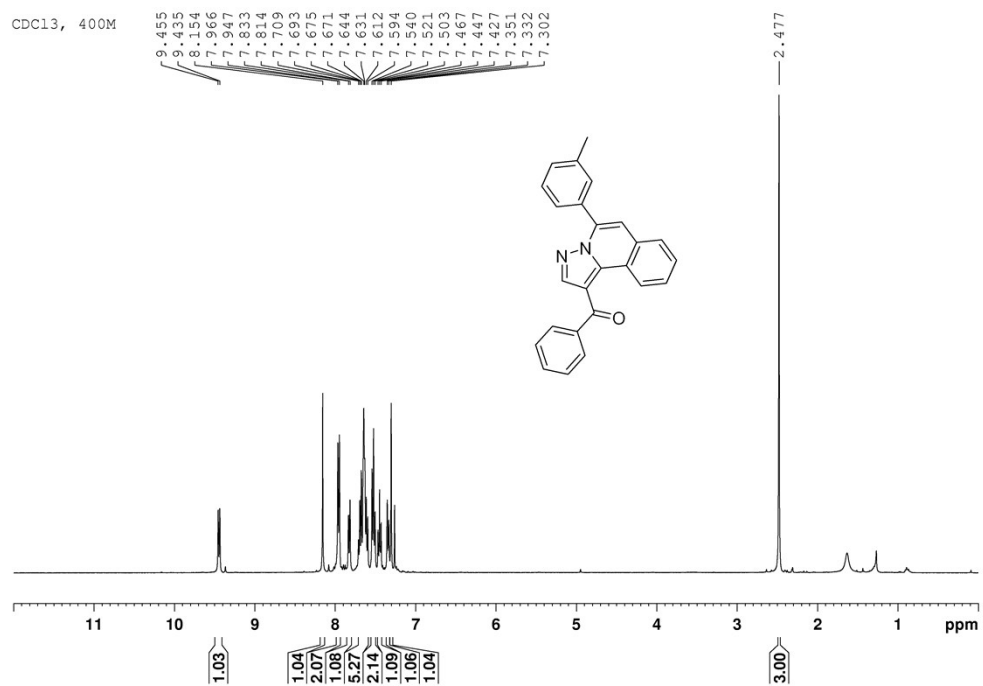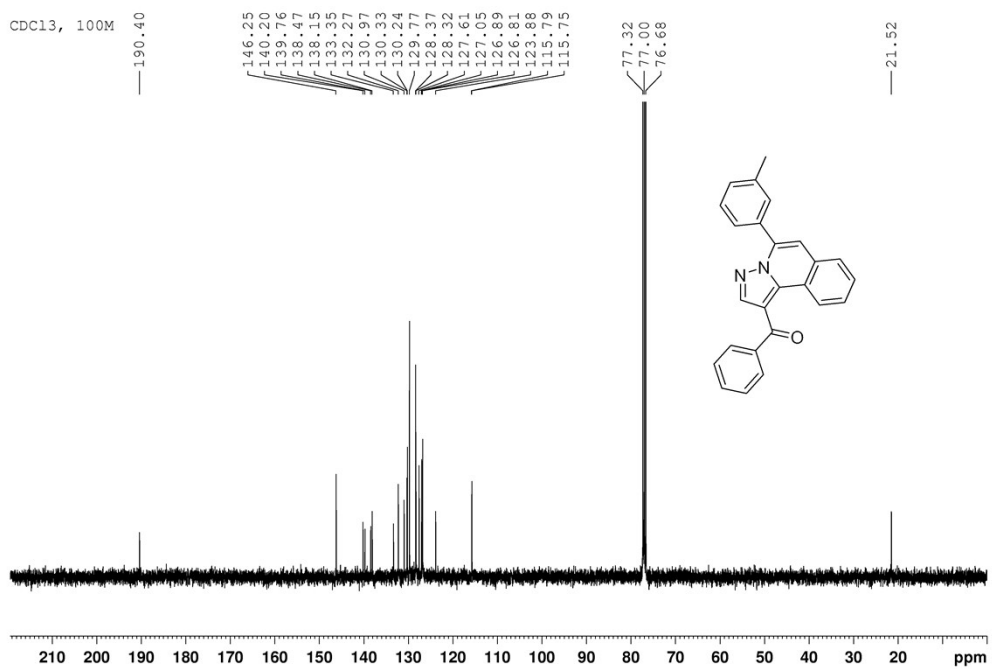

Phenyl(5-(thiophen-3-yl)pyrazolo[5,1-a]isoquinolin-1-yl)methanone (**2g**)

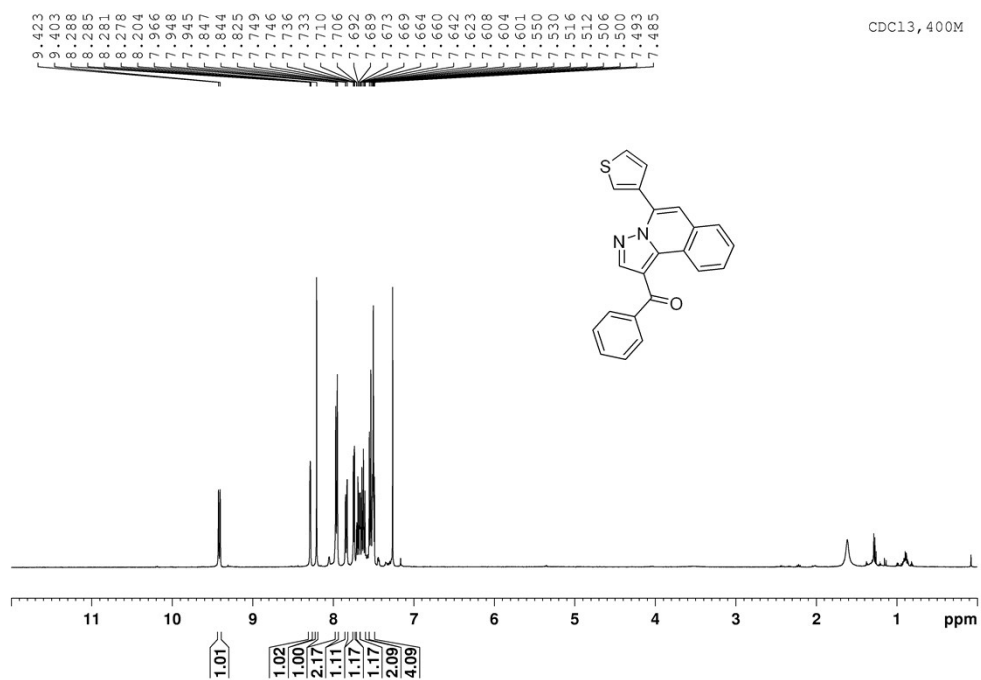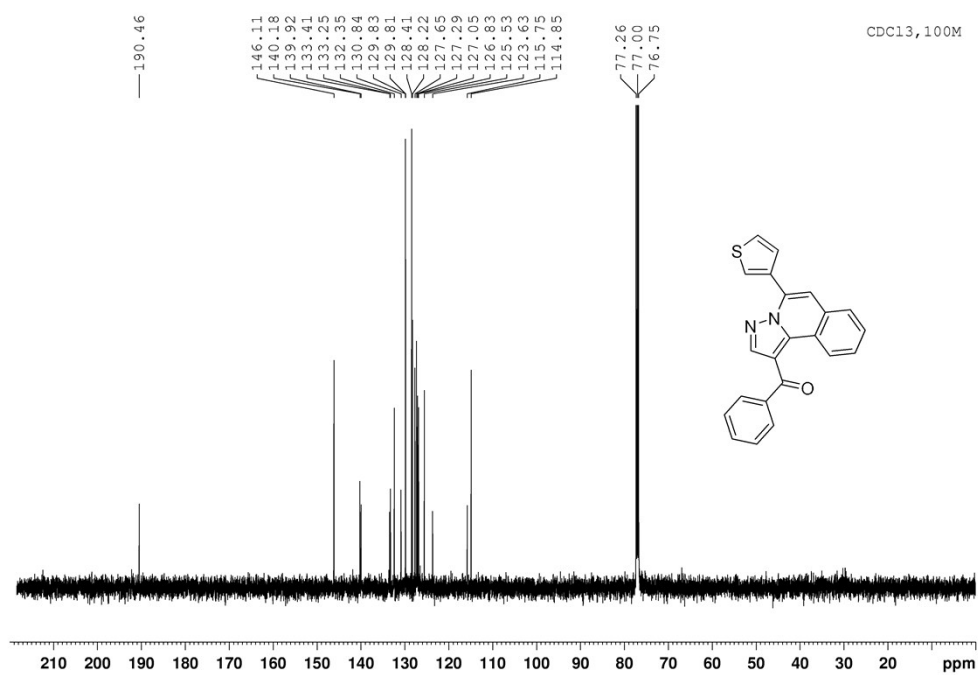



(1-Benzoylpyrazolo[5,1-a]isoquinolin-5-yl)methyl acetate (**2i**)

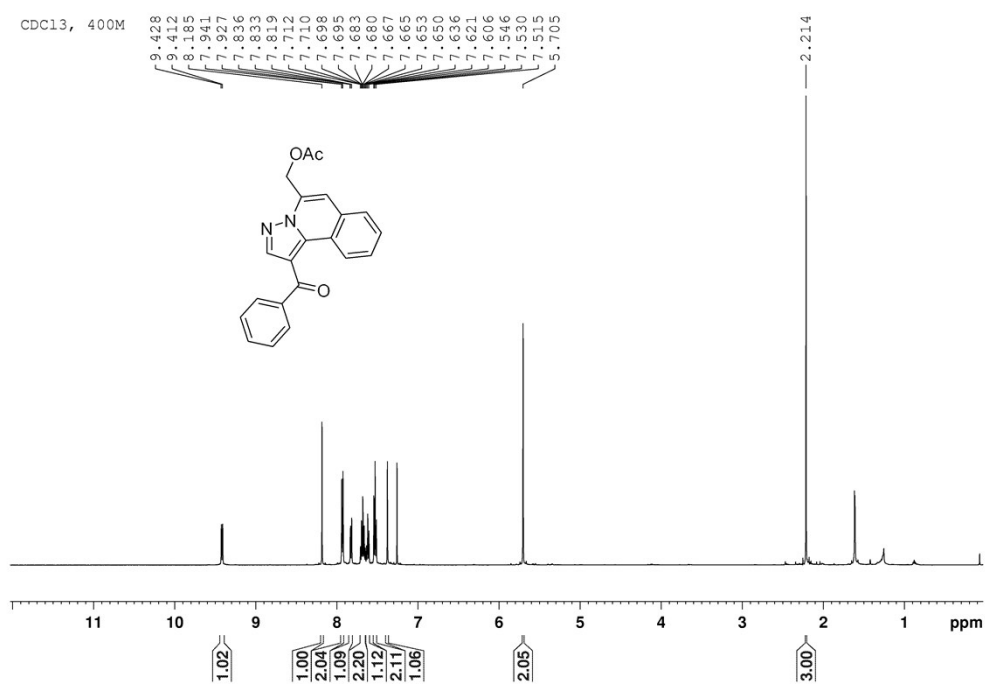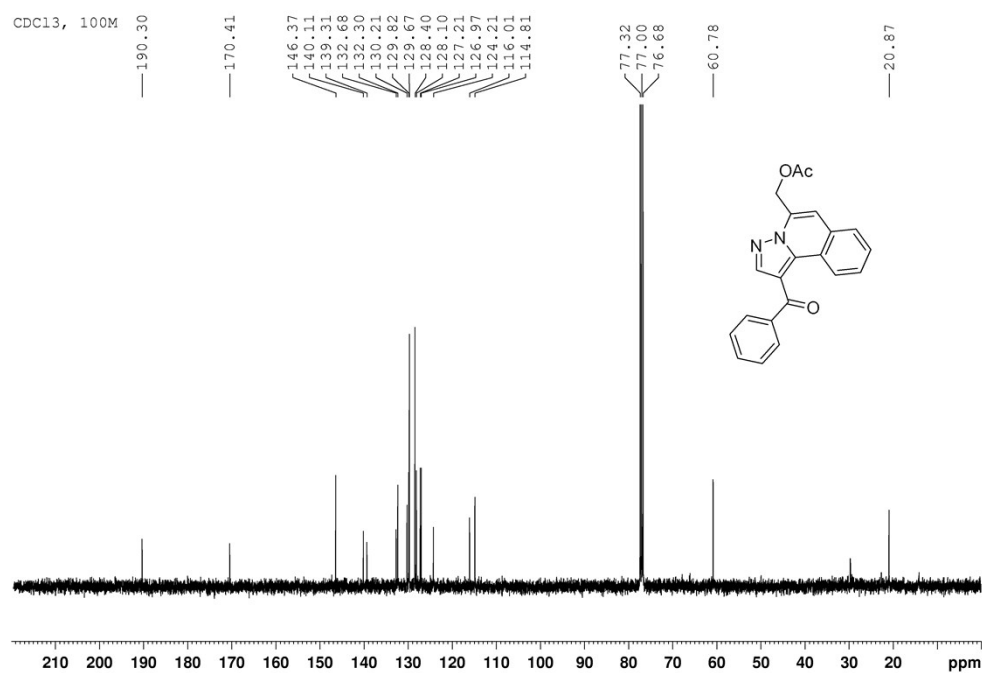

(5-Cyclopropylpyrazolo[5,1-a]isoquinolin-1-yl)(phenyl)methanone (**2j**)

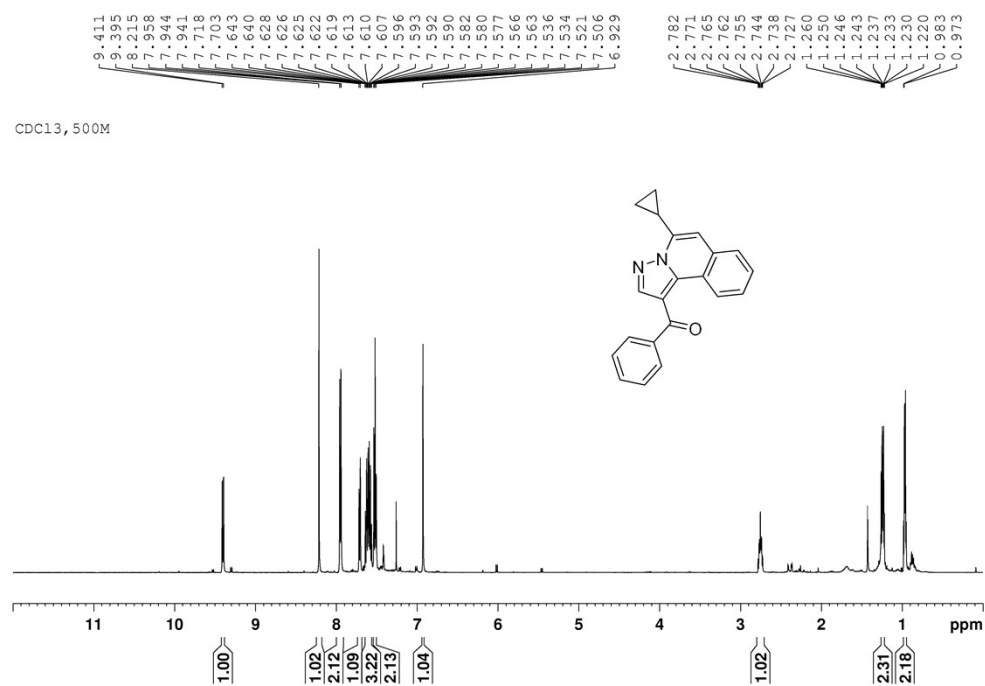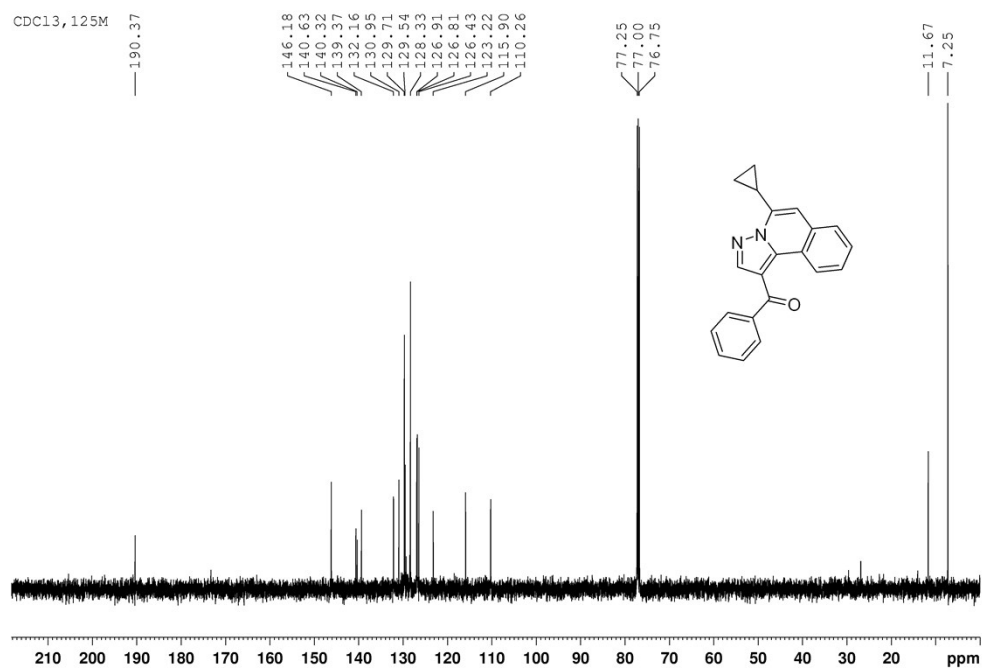

(5-Pentylpyrazolo[5,1-a]isoquinolin-1-yl)(phenyl)methanone (**2k**)

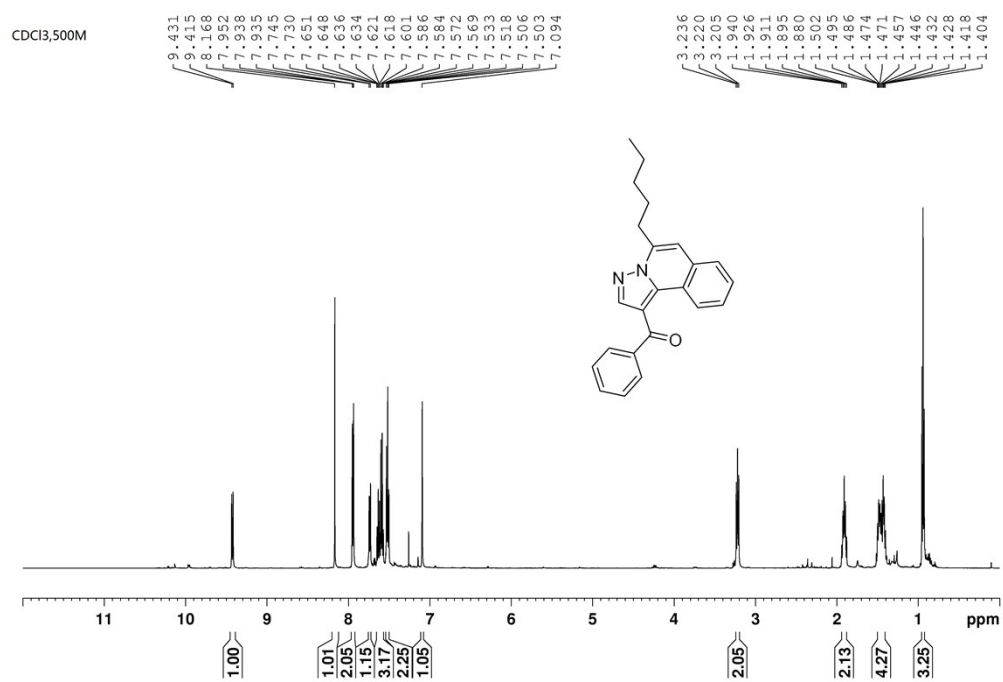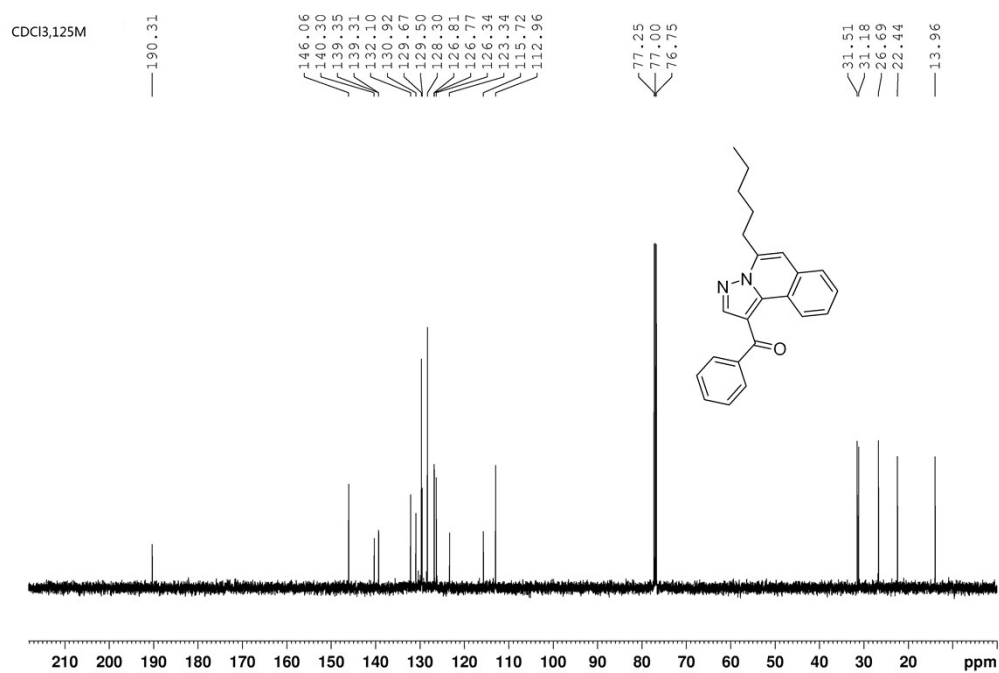

(2-Methyl-5-phenylpyrazolo[5,1-a]isoquinolin-1-yl)(phenyl)methanone (**21**)

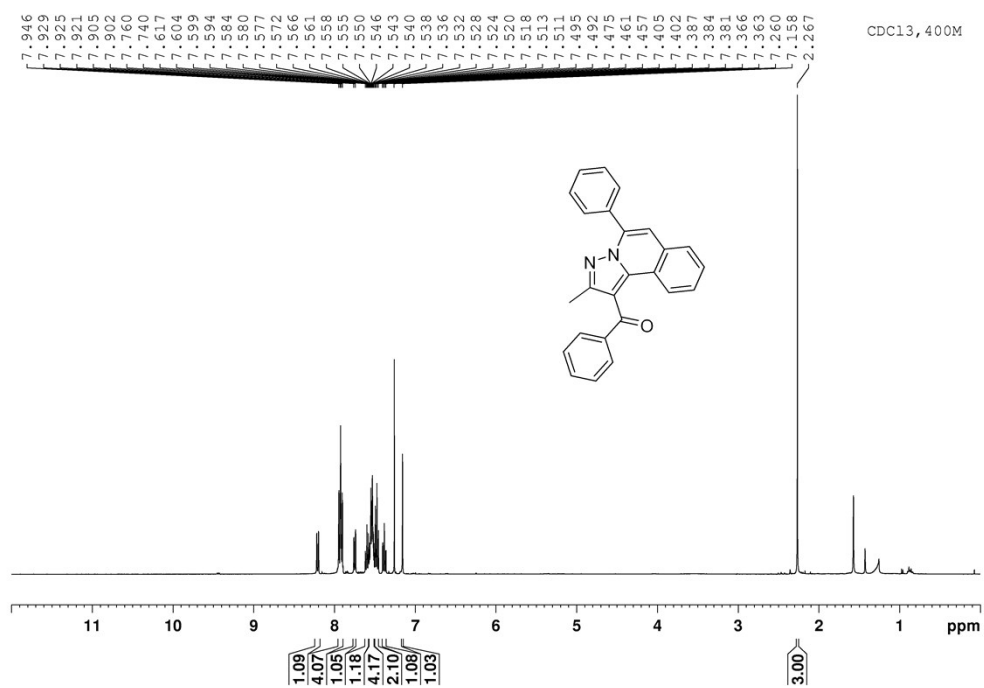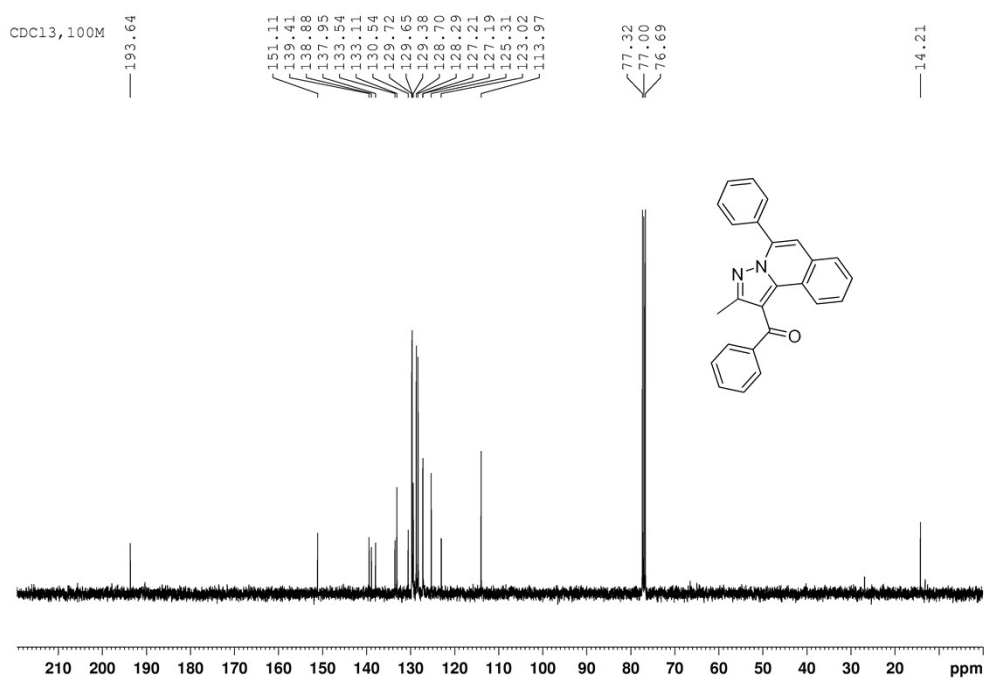

(2-Ethyl-5-phenylpyrazolo[5,1-a]isoquinolin-1-yl)(phenyl)methanone (**2m**)

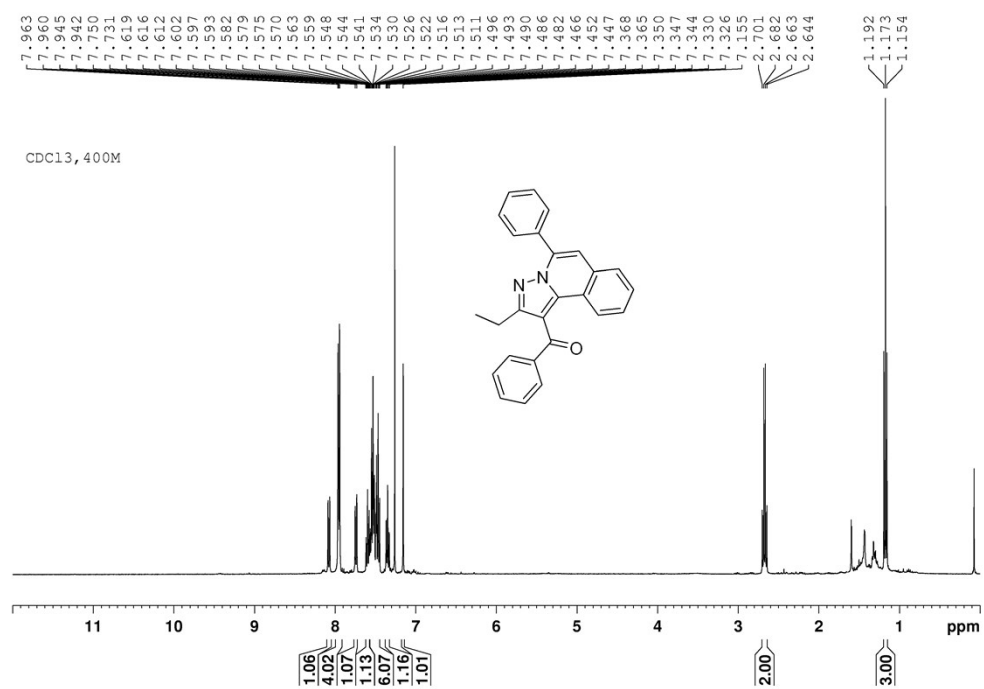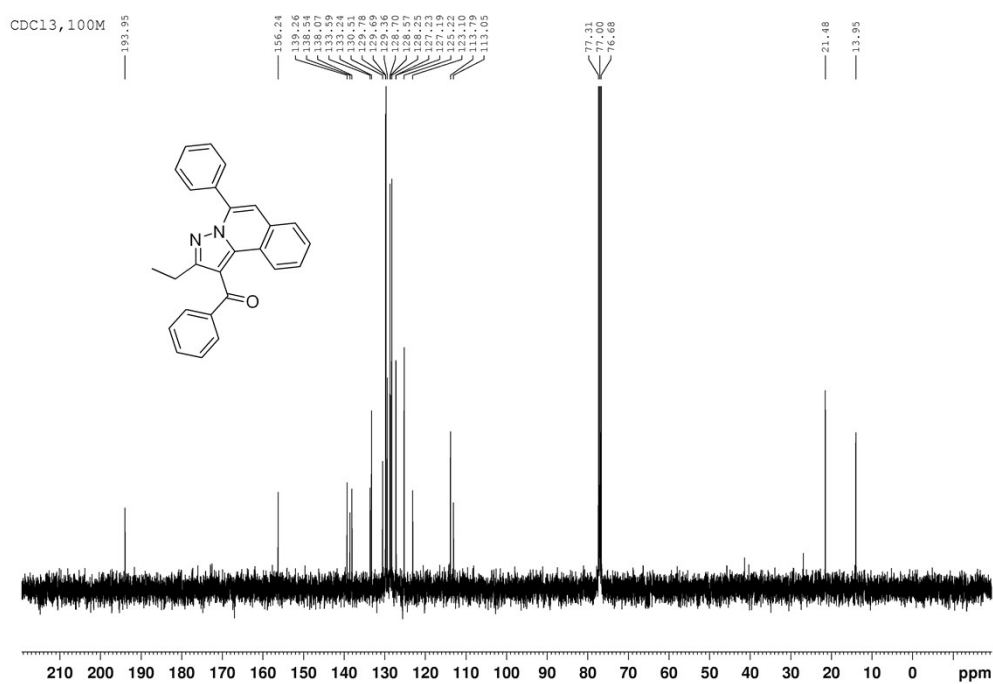

(9-Chloro-5-phenylpyrazolo[5,1-a]isoquinolin-1-yl)(phenyl)methanone (**2n**)

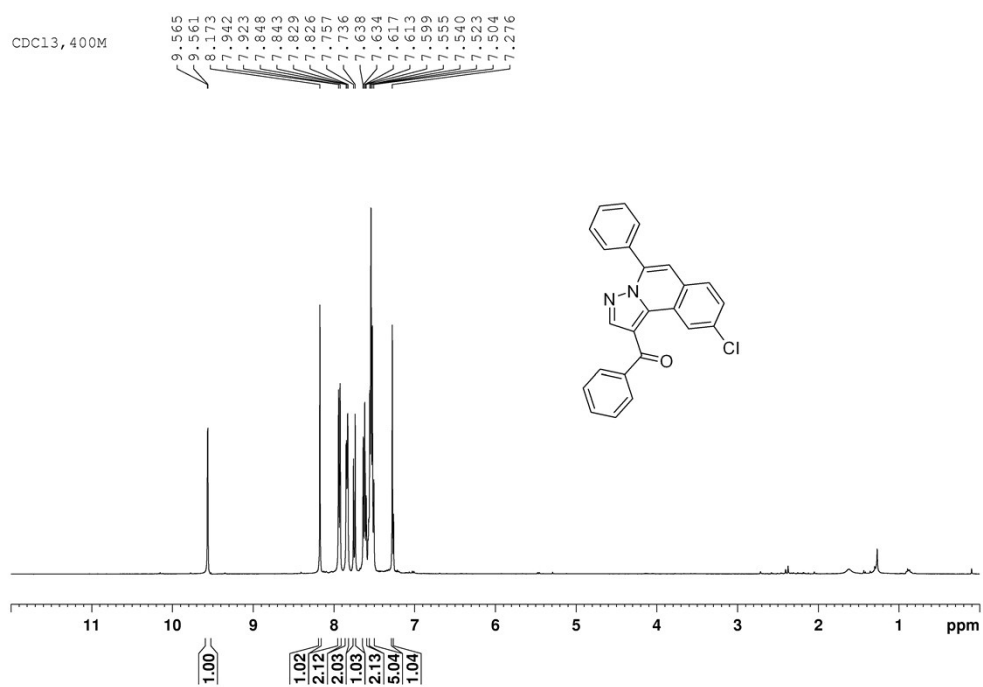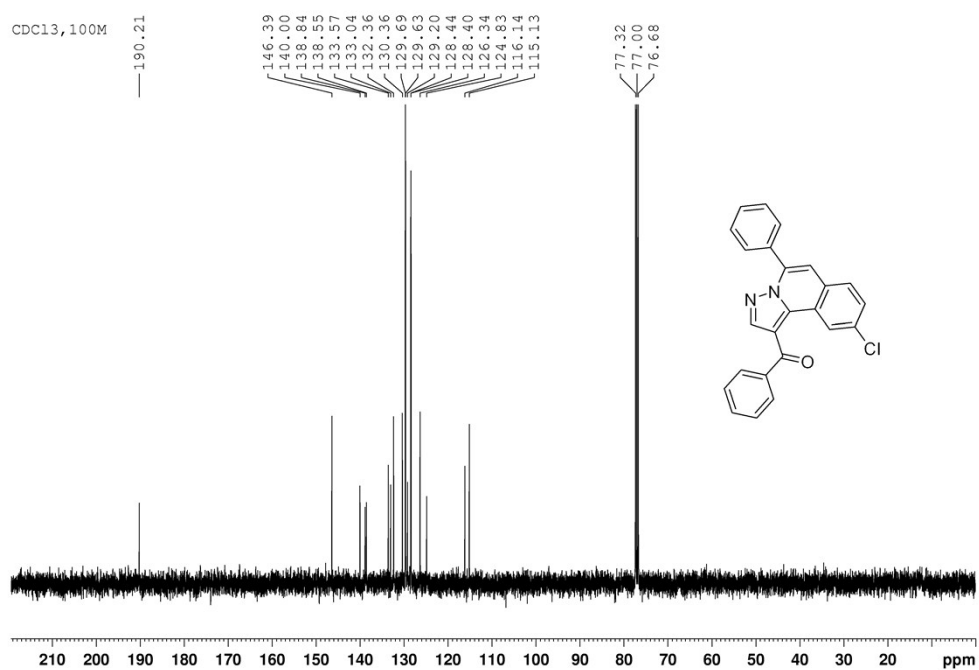

(9-Methoxy-5-phenylpyrazolo[5,1-a]isoquinolin-1-yl)(phenyl)methanone (**2o**)

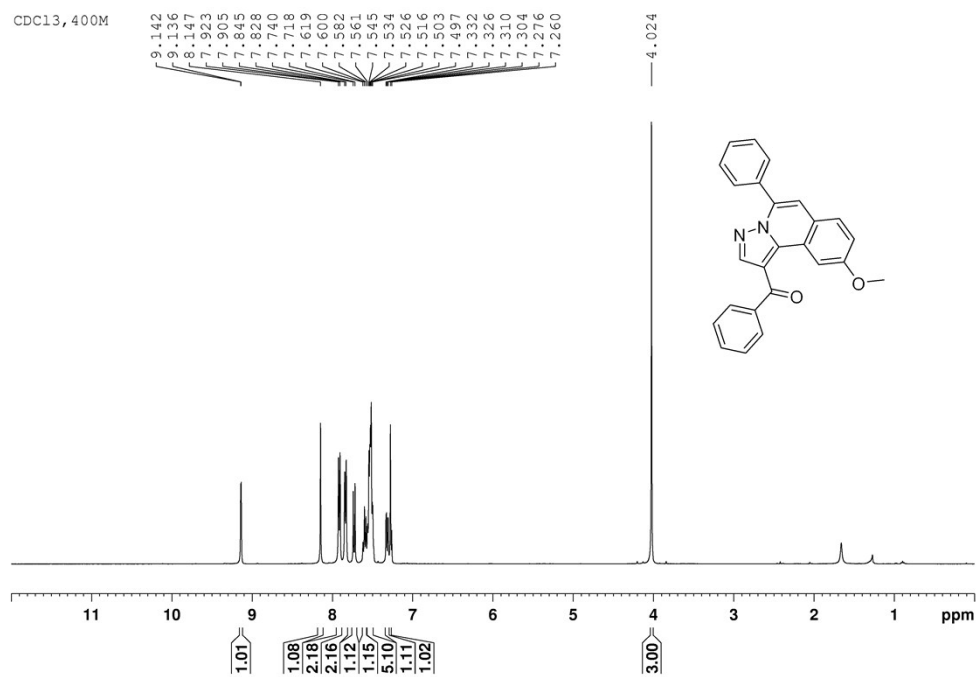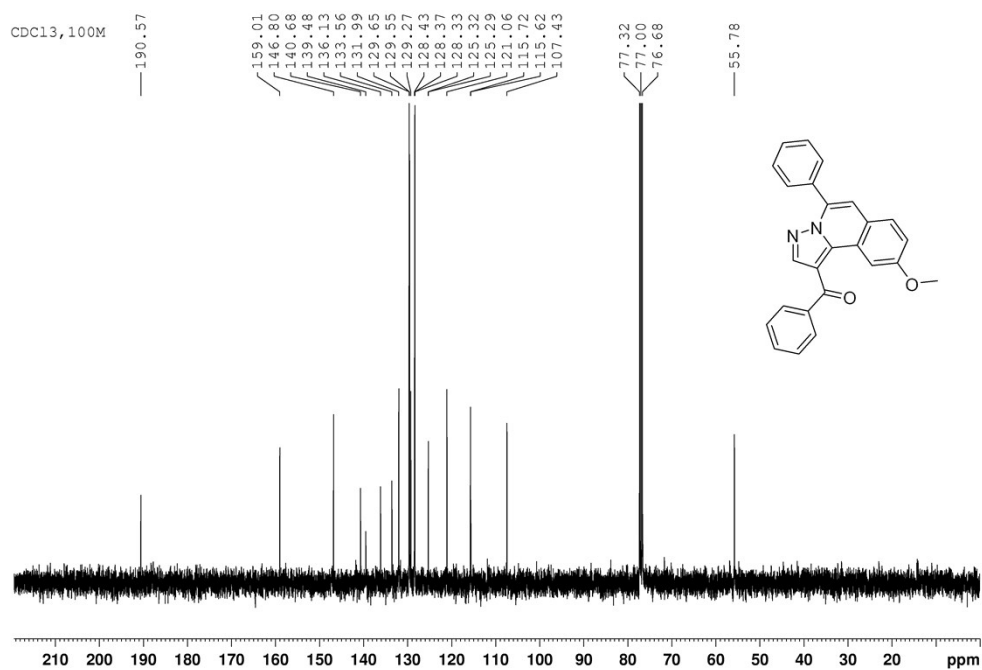

(8-Methyl-5-phenylpyrazolo[5,1-a]isoquinolin-1-yl)(phenyl)methanone (**2p**)

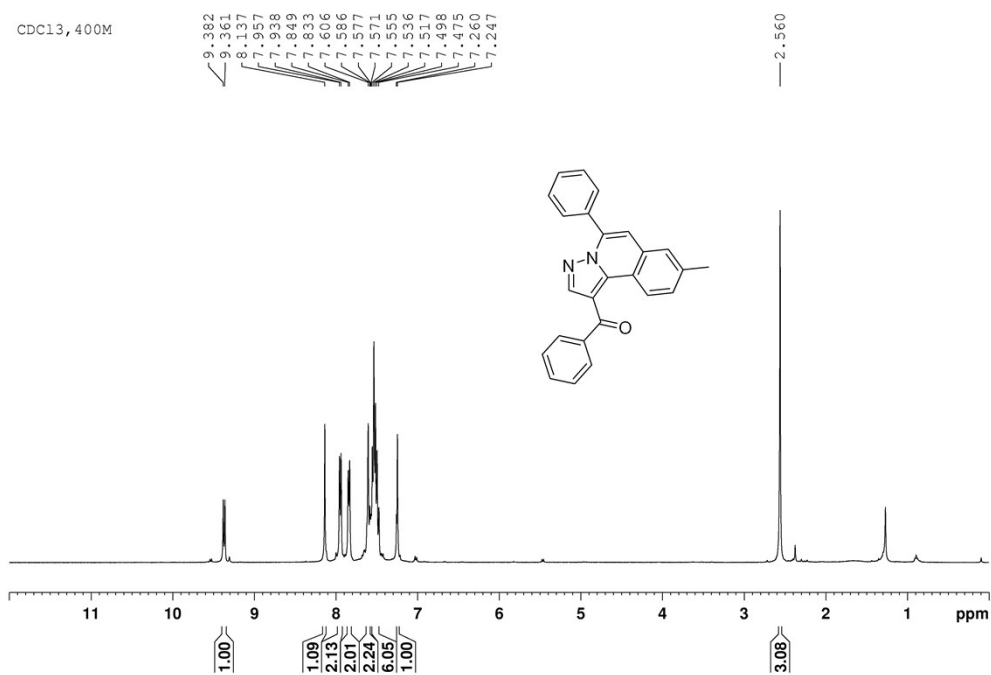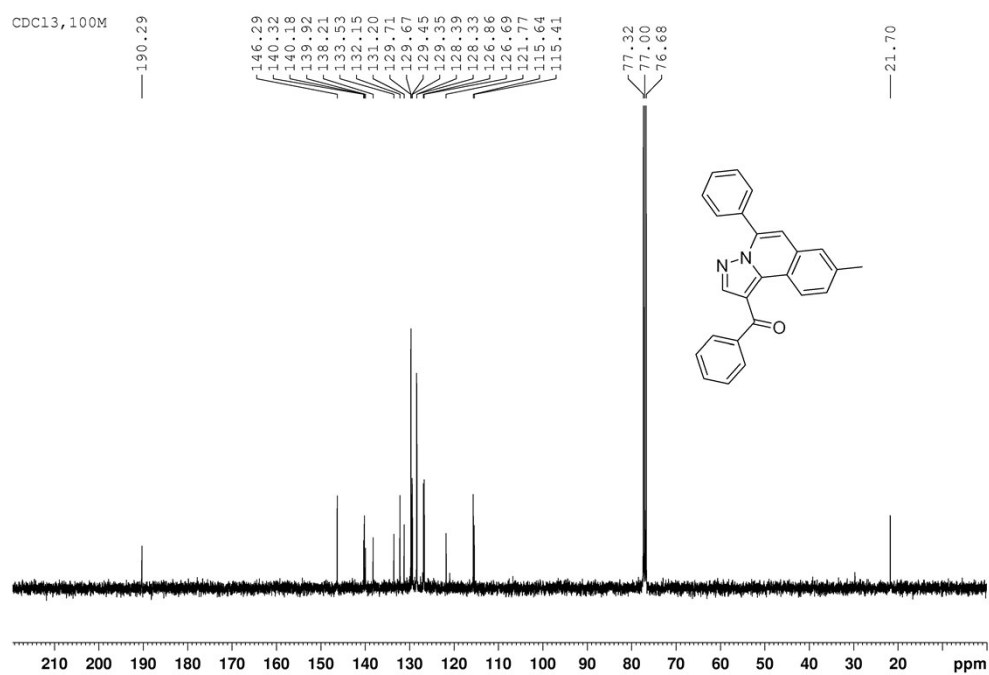



Naphthalen-1-yl(5-phenylpyrazolo[5,1-a]isoquinolin-1-yl)methanone (**2q**)

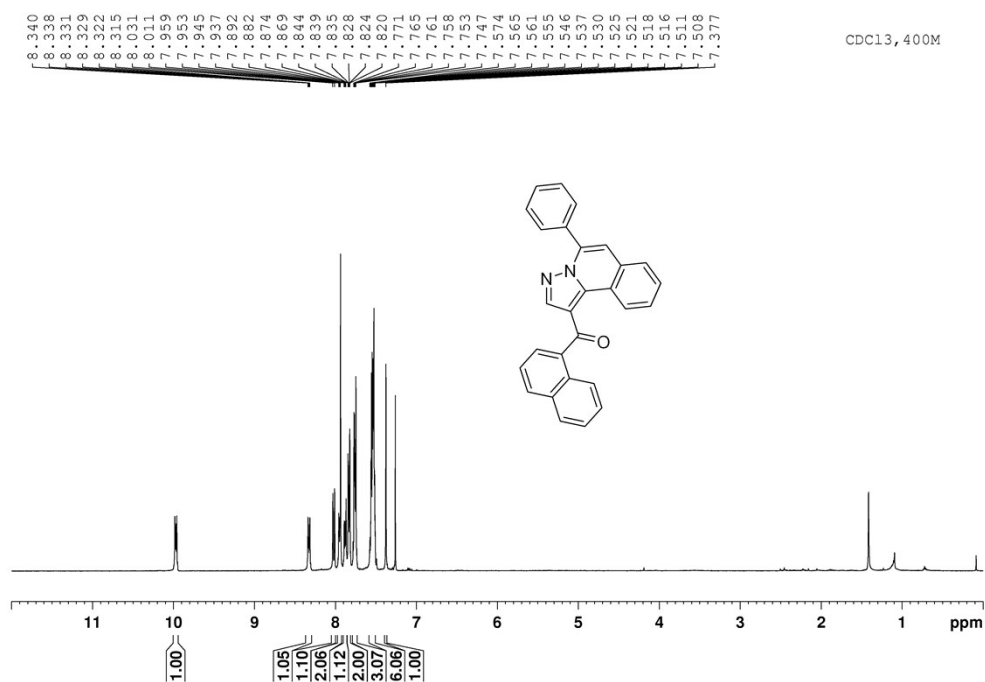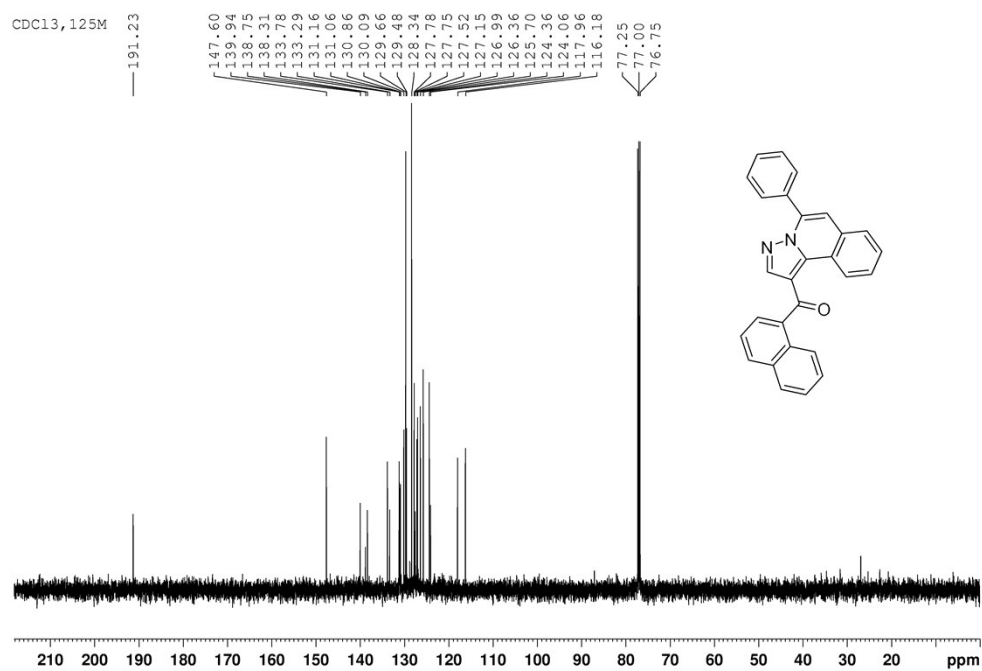

(4-Chlorophenyl)(5-phenylpyrazolo[5,1-a]isoquinolin-1-yl)methanone (**2r**)

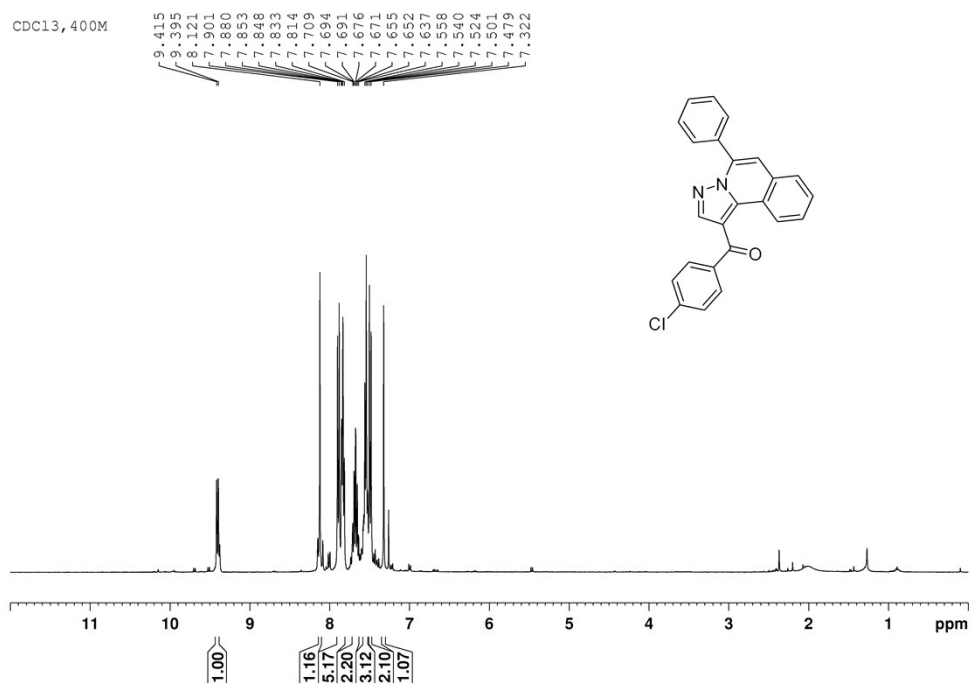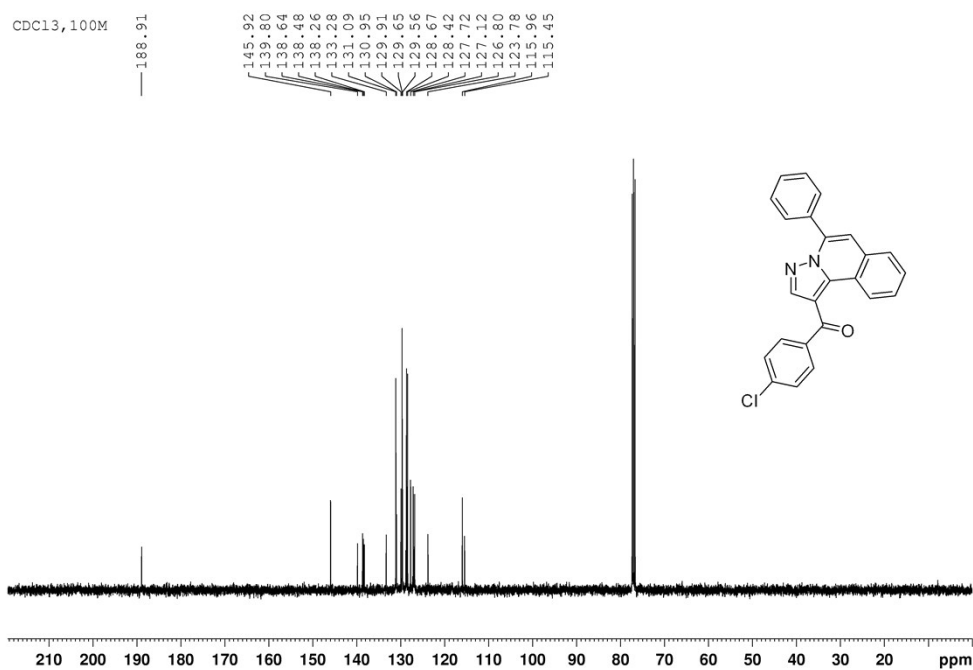

(5-Phenylpyrazolo[5,1-a]isoquinolin-1-yl)(p-tolyl)methanone (**2s**)

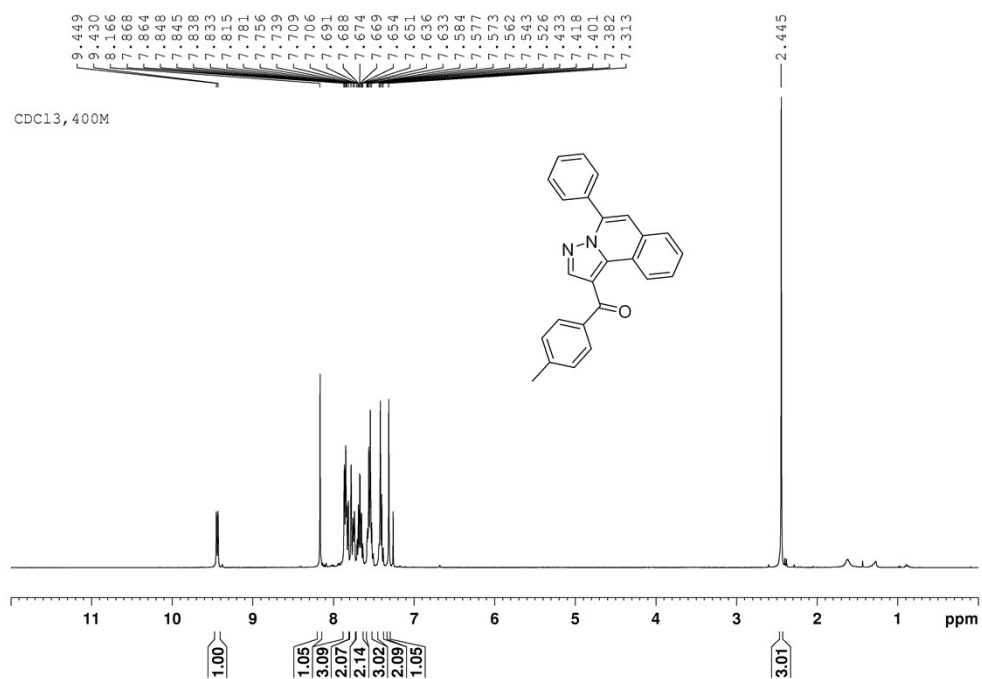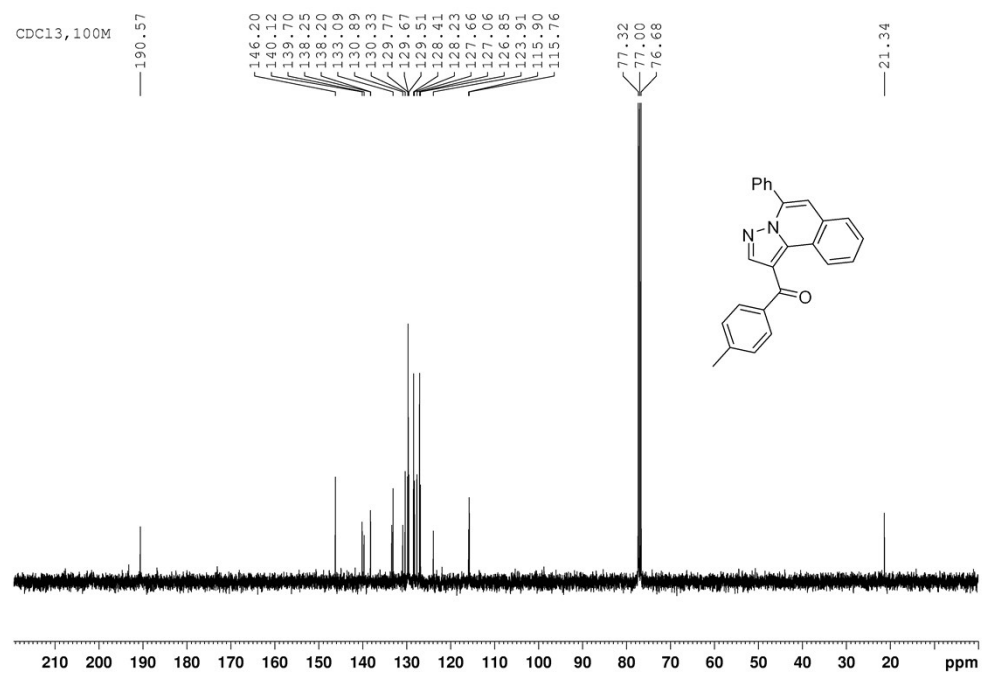

(9-Chloro-5-phenylpyrazolo[5,1-a]isoquinolin-1-yl)(p-tolyl)methanone (**2v**)

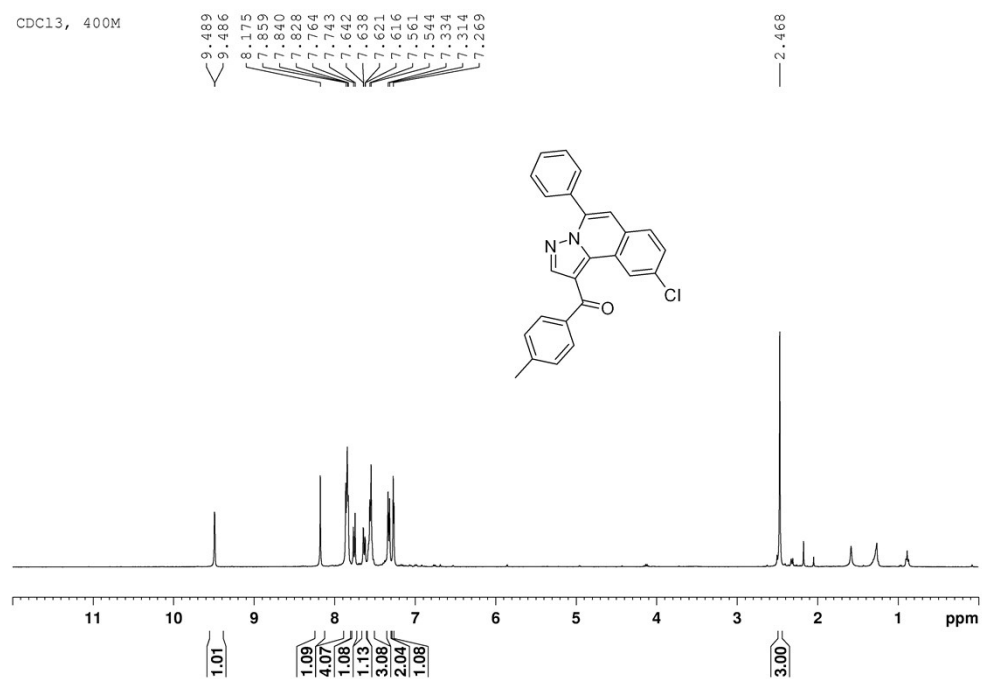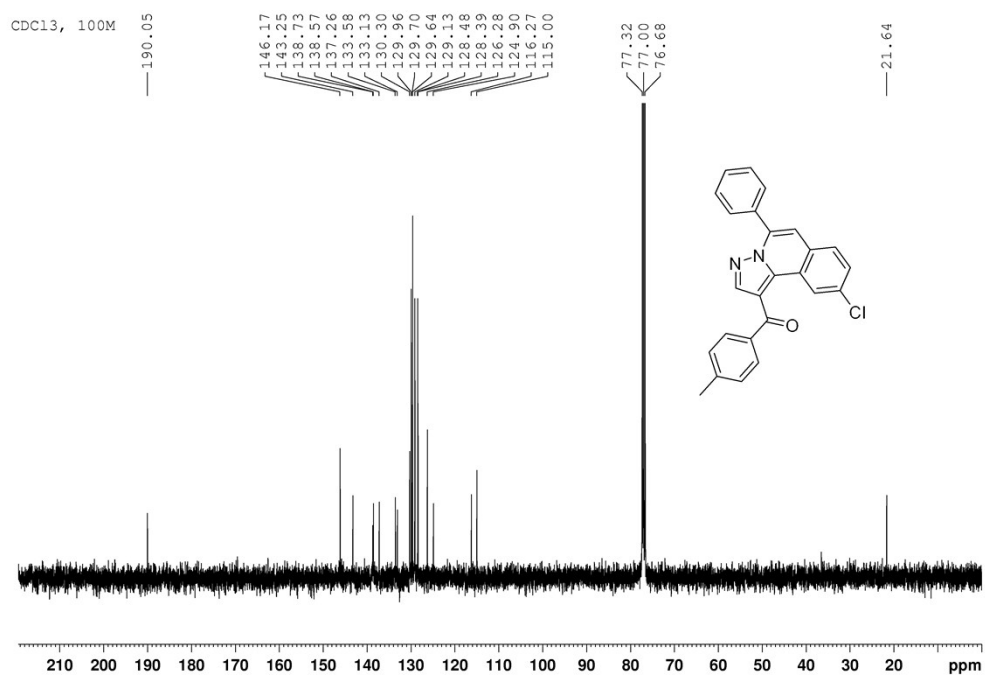

9-Chloro-1-(methoxy(p-tolyl)methyl)-5-phenylpyrazolo[5,1-a]isoquinoline (**4v**)

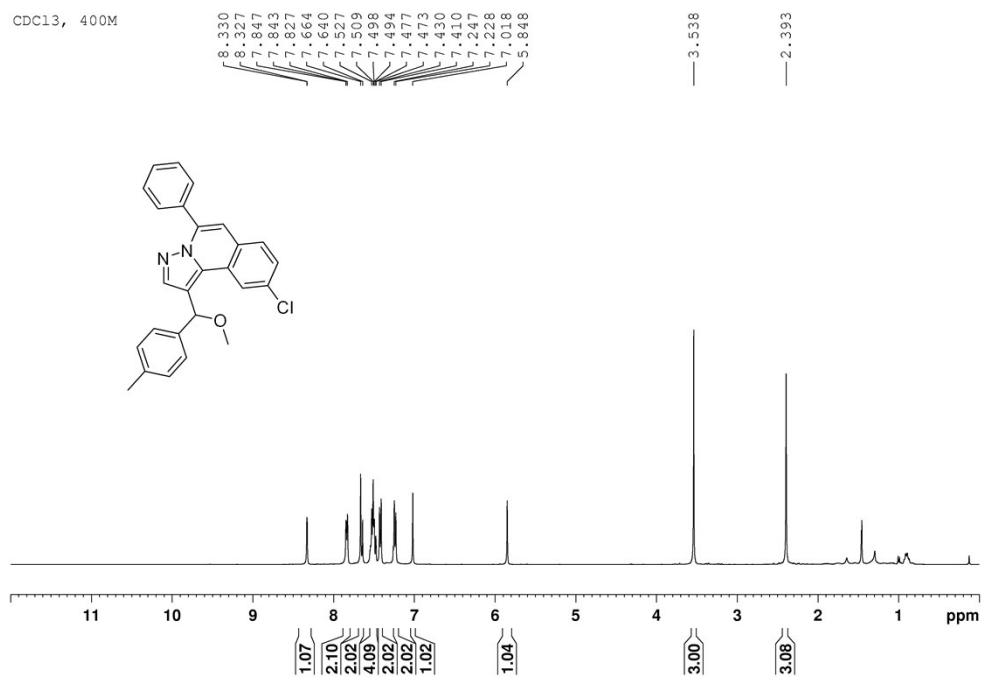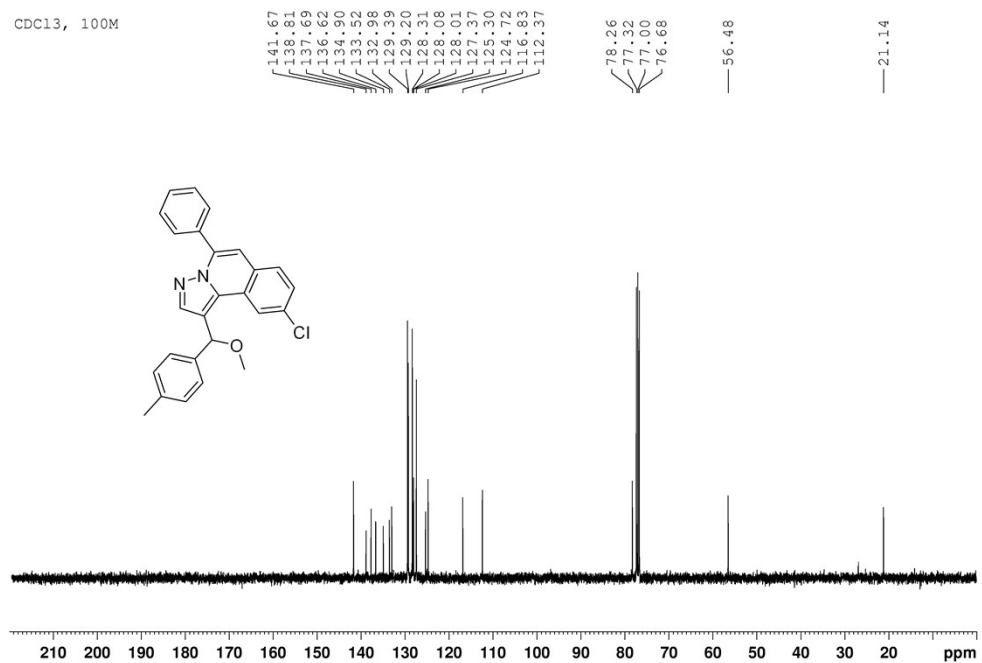

3-phenylisoquinoline (**12a**)

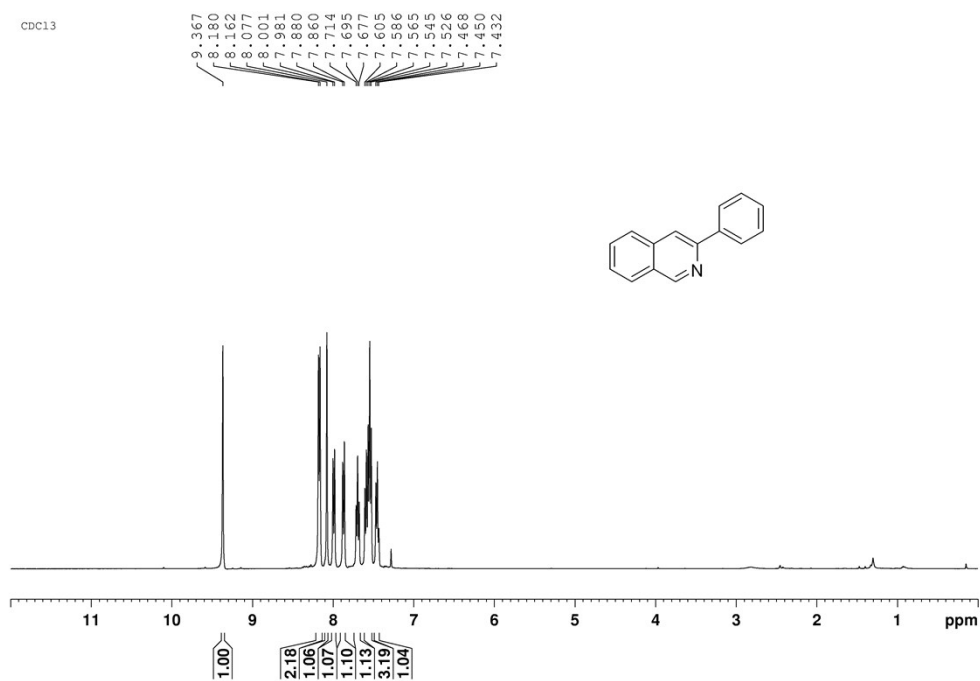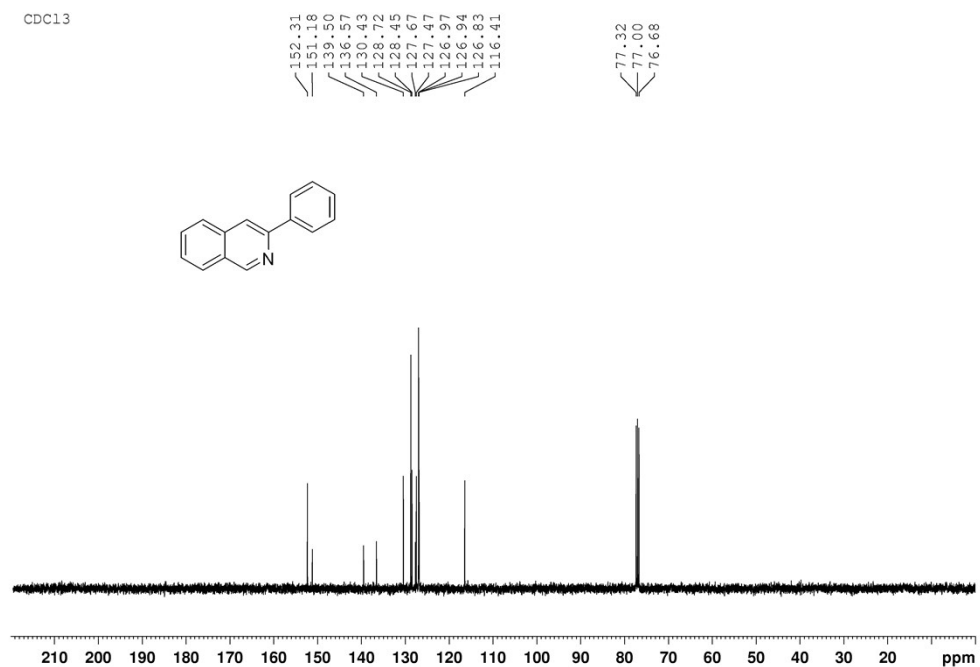

Supplement: c7qo00249a1.pdf [file c7qo00249a1.pdf]
